# Supplementary material for: Early genome activation in Drosophila is extensive with an initial tendency for aborted transcripts and retained introns
Source: HighWire-hosted journal article supplement (doi:10.1101/gr.242164.118), 2019-06-24
Supplement: Supplemental_Table_S2.xlsx [file Supplemental_Table_S2.xlsx]

## Sheet: GO (11).xls
Supplementary table 2: Summary of gene ontology terms enriched in zygotic gene sets.
GO enrichment analysis was done with GOrilla, comparing each set of zygotic genes (set identifier in Stage) to the set of genes with maternally deposited transcripts. All enriched GO Terms are noted for each stage of zygotic genes. Gorilla output is listed for each GO term, including a description of the GO term, the p-value of the enrichment, the FDR q-value of the enrichment, the calculated enr…
Stage	GO Term	Description	P-value	FDR q-value	Enrichment	Num genes in intersection	Genes
NC 7-9	GO:0061382	Malpighian tubule tip cell differentiation	1.45e-05	0.088	254.69	2	[sc - scute, l(1)sc - lethal of scute]
NC 7-9	GO:0007540	sex determination, establishment of X:A ratio	1.45e-05	0.044	254.69	2	[sisA - sisterless a, sc - scute]
NC 7-9	GO:0007400	neuroblast fate determination	0.000144	0.291	101.88	2	[sc - scute, l(1)sc - lethal of scute]
NC 7-9	GO:0048867	stem cell fate determination	0.000215	0.327	84.9	2	[sc - scute, l(1)sc - lethal of scute]
NC 7-9	GO:0007423	sensory organ development	0.000331	0.402	11.32	4	[E(spl)m4-BFM - enhancer of split m4, bearded family member, sc - scute, l(1)sc - lethal of scute, amos - absent md neurons and olfactory sensilla]
NC 7-9	GO:0001709	cell fate determination	0.000725	0.736	16.26	3	[sc - scute, l(1)sc - lethal of scute, amos - absent md neurons and olfactory sensilla]
NC 9-10	GO:0048513	animal organ development	1.41e-15	8.64e-12	9.61	19	[h - hairy, E(spl)m5-HLH - enhancer of split m5, helix-loop-helix, scw - screw, ato - atonal, ac - achaete, eve - even skipped, run - runt, zen - zerknullt, Bro - brother, spo - spook, tll - tailless, slp1 - sloppy paired 1, esg - escargot, Ocho - cg3396 gene product from transcript cg3396-rb, CG13465 - cg13465 gene product from transcript cg13465-ra, Brd - bearded, BobA - brother of bearded a, T…
NC 9-10	GO:0001708	cell fate specification	2.76e-14	8.42e-11	49.25	9	[tll - tailless, esg - escargot, Ocho - cg3396 gene product from transcript cg3396-rb, CG13465 - cg13465 gene product from transcript cg13465-ra, Brd - bearded, BobA - brother of bearded a, scw - screw, Tom - twin of m4, sna - snail]
NC 9-10	GO:0001709	cell fate determination	6.89e-12	1.4e-08	22.29	10	[esg - escargot, CG13465 - cg13465 gene product from transcript cg13465-ra, BobA - brother of bearded a, ato - atonal, Brd - bearded, Tom - twin of m4, ac - achaete, sna - snail, eve - even skipped, run - runt]
NC 9-10	GO:0048856	anatomical structure development	7.75e-12	1.18e-08	4.72	22	[h - hairy, E(spl)m5-HLH - enhancer of split m5, helix-loop-helix, mas - masquerade, ato - atonal, Bsg25A - blastoderm-specific gene 25a, scw - screw, ac - achaete, eve - even skipped, os - outstretched, run - runt, zen - zerknullt, Bro - brother, tll - tailless, spo - spook, esg - escargot, slp1 - sloppy paired 1, Ocho - cg3396 gene product from transcript cg3396-rb, CG13465 - cg13465 gene produ…
NC 9-10	GO:0032502	developmental process	7.84e-12	9.57e-09	3.59	26	[E(spl)m5-HLH - enhancer of split m5, helix-loop-helix, Bsg25A - blastoderm-specific gene 25a, ac - achaete, Z600 - cg17962 gene product from transcript cg17962-ra, os - outstretched, run - runt, Bro - brother, spo - spook, esg - escargot, Ocho - cg3396 gene product from transcript cg3396-rb, Brd - bearded, Tom - twin of m4, sna - snail, CG13427 - cg13427 gene product from transcript cg13427-ra, …
NC 9-10	GO:0007423	sensory organ development	1.36e-10	1.38e-07	13.65	11	[Bro - brother, E(spl)m5-HLH - enhancer of split m5, helix-loop-helix, CG13465 - cg13465 gene product from transcript cg13465-ra, Ocho - cg3396 gene product from transcript cg3396-rb, BobA - brother of bearded a, ato - atonal, Brd - bearded, Tom - twin of m4, ac - achaete, sna - snail, zen - zerknullt]
NC 9-10	GO:0007219	Notch signaling pathway	1.52e-10	1.32e-07	40.13	7	[h - hairy, E(spl)m5-HLH - enhancer of split m5, helix-loop-helix, Ocho - cg3396 gene product from transcript cg3396-rb, CG13465 - cg13465 gene product from transcript cg13465-ra, Brd - bearded, BobA - brother of bearded a, Tom - twin of m4]
NC 9-10	GO:0048869	cellular developmental process	1.77e-09	1.35e-06	4.79	18	[h - hairy, E(spl)m5-HLH - enhancer of split m5, helix-loop-helix, ato - atonal, scw - screw, ac - achaete, eve - even skipped, os - outstretched, run - runt, tll - tailless, spo - spook, esg - escargot, slp1 - sloppy paired 1, CG13465 - cg13465 gene product from transcript cg13465-ra, Ocho - cg3396 gene product from transcript cg3396-rb, Brd - bearded, BobA - brother of bearded a, Tom - twin of …
NC 9-10	GO:0007378	amnioserosa formation	3.97e-09	2.7e-06	120.38	4	[tld - tolloid, scw - screw, srw - shrew, zen - zerknullt]
NC 9-10	GO:0016360	sensory organ precursor cell fate determination	2.21e-08	1.35e-05	50.16	5	[CG13465 - cg13465 gene product from transcript cg13465-ra, Brd - bearded, ato - atonal, BobA - brother of bearded a, Tom - twin of m4]
NC 9-10	GO:0060582	cell fate determination involved in pattern specification	2.21e-08	1.23e-05	50.16	5	[CG13465 - cg13465 gene product from transcript cg13465-ra, BobA - brother of bearded a, ato - atonal, Brd - bearded, Tom - twin of m4]
NC 9-10	GO:0007417	central nervous system development	2.5e-08	1.27e-05	30.1	6	[mas - masquerade, spo - spook, esg - escargot, ac - achaete, sna - snail, eve - even skipped]
NC 9-10	GO:0007389	pattern specification process	3e-08	1.41e-05	7.19	12	[h - hairy, E(spl)m5-HLH - enhancer of split m5, helix-loop-helix, tll - tailless, slp1 - sloppy paired 1, tld - tolloid, scw - screw, sna - snail, srw - shrew, eve - even skipped, os - outstretched, run - runt, zen - zerknullt]
NC 9-10	GO:0006357	regulation of transcription by RNA polymerase II	3.21e-08	1.4e-05	5.66	14	[h - hairy, tld - tolloid, ato - atonal, scw - screw, ac - achaete, eve - even skipped, zen - zerknullt, run - runt, Bro - brother, tll - tailless, SNCF - soxneuro co-factor, esg - escargot, slp1 - sloppy paired 1, sna - snail]
NC 9-10	GO:0009653	anatomical structure morphogenesis	4.15e-08	1.69e-05	5.03	15	[h - hairy, tld - tolloid, ato - atonal, ac - achaete, eve - even skipped, os - outstretched, Z600 - cg17962 gene product from transcript cg17962-ra, run - runt, spo - spook, tll - tailless, esg - escargot, slp1 - sloppy paired 1, Tom - twin of m4, sna - snail, CG13427 - cg13427 gene product from transcript cg13427-ra]
NC 9-10	GO:0032501	multicellular organismal process	5.7e-08	2.18e-05	3.87	18	[h - hairy, E(spl)m5-HLH - enhancer of split m5, helix-loop-helix, Ilp4 - insulin-like peptide 4, mas - masquerade, tld - tolloid, ato - atonal, Bsg25A - blastoderm-specific gene 25a, scw - screw, eve - even skipped, os - outstretched, run - runt, zen - zerknullt, spo - spook, tll - tailless, esg - escargot, slp1 - sloppy paired 1, sna - snail, srw - shrew]
NC 9-10	GO:0050789	regulation of biological process	3.92e-07	0.000141	2.07	28	[E(spl)m5-HLH - enhancer of split m5, helix-loop-helix, CG13716 - cg13716 gene product from transcript cg13716-ra, Ilp4 - insulin-like peptide 4, Bsg25A - blastoderm-specific gene 25a, ac - achaete, os - outstretched, Z600 - cg17962 gene product from transcript cg17962-ra, run - runt, Bro - brother, esg - escargot, Ocho - cg3396 gene product from transcript cg3396-rb, Brd - bearded, Tom - twin of…
NC 9-10	GO:0006355	regulation of transcription, DNA-templated	4.53e-07	0.000154	3.89	16	[h - hairy, E(spl)m5-HLH - enhancer of split m5, helix-loop-helix, tld - tolloid, Bsg25A - blastoderm-specific gene 25a, scw - screw, ato - atonal, ac - achaete, eve - even skipped, run - runt, zen - zerknullt, Bro - brother, SNCF - soxneuro co-factor, tll - tailless, esg - escargot, slp1 - sloppy paired 1, sna - snail]
NC 9-10	GO:2001141	regulation of RNA biosynthetic process	4.53e-07	0.000146	3.89	16	[h - hairy, E(spl)m5-HLH - enhancer of split m5, helix-loop-helix, tld - tolloid, Bsg25A - blastoderm-specific gene 25a, scw - screw, ato - atonal, ac - achaete, eve - even skipped, run - runt, zen - zerknullt, Bro - brother, SNCF - soxneuro co-factor, tll - tailless, esg - escargot, slp1 - sloppy paired 1, sna - snail]
NC 9-10	GO:1903506	regulation of nucleic acid-templated transcription	4.53e-07	0.000138	3.89	16	[h - hairy, E(spl)m5-HLH - enhancer of split m5, helix-loop-helix, tld - tolloid, Bsg25A - blastoderm-specific gene 25a, scw - screw, ato - atonal, ac - achaete, eve - even skipped, run - runt, zen - zerknullt, Bro - brother, SNCF - soxneuro co-factor, tll - tailless, esg - escargot, slp1 - sloppy paired 1, sna - snail]
NC 9-10	GO:0048731	system development	4.95e-07	0.000144	10.58	8	[h - hairy, mas - masquerade, spo - spook, esg - escargot, ato - atonal, ac - achaete, sna - snail, eve - even skipped]
NC 9-10	GO:0065007	biological regulation	5.81e-07	0.000161	1.96	29	[E(spl)m5-HLH - enhancer of split m5, helix-loop-helix, CG13716 - cg13716 gene product from transcript cg13716-ra, Ilp4 - insulin-like peptide 4, Bsg25A - blastoderm-specific gene 25a, ac - achaete, os - outstretched, Z600 - cg17962 gene product from transcript cg17962-ra, run - runt, Bro - brother, spo - spook, esg - escargot, Ocho - cg3396 gene product from transcript cg3396-rb, Brd - bearded, …
NC 9-10	GO:0048646	anatomical structure formation involved in morphogenesis	6.13e-07	0.000163	7.12	10	[h - hairy, E(spl)m5-HLH - enhancer of split m5, helix-loop-helix, slp1 - sloppy paired 1, tld - tolloid, scw - screw, sna - snail, srw - shrew, eve - even skipped, Z600 - cg17962 gene product from transcript cg17962-ra, zen - zerknullt]
NC 9-10	GO:0007166	cell surface receptor signaling pathway	1.33e-06	0.000339	7.68	9	[h - hairy, E(spl)m5-HLH - enhancer of split m5, helix-loop-helix, Ilp4 - insulin-like peptide 4, CG13465 - cg13465 gene product from transcript cg13465-ra, Ocho - cg3396 gene product from transcript cg3396-rb, scw - screw, BobA - brother of bearded a, Brd - bearded, Tom - twin of m4]
NC 9-10	GO:0045944	positive regulation of transcription by RNA polymerase II	1.5e-06	0.000367	7.58	9	[SNCF - soxneuro co-factor, tll - tailless, esg - escargot, ato - atonal, ac - achaete, sna - snail, eve - even skipped, run - runt, zen - zerknullt]
NC 9-10	GO:0045165	cell fate commitment	1.74e-06	0.000409	15.37	6	[h - hairy, tll - tailless, esg - escargot, ato - atonal, sna - snail, eve - even skipped]
NC 9-10	GO:0035282	segmentation	2.06e-06	0.000467	22.29	5	[h - hairy, E(spl)m5-HLH - enhancer of split m5, helix-loop-helix, slp1 - sloppy paired 1, eve - even skipped, os - outstretched]
NC 9-10	GO:0007366	periodic partitioning by pair rule gene	2.08e-06	0.000455	90.29	3	[h - hairy, eve - even skipped, run - runt]
NC 9-10	GO:0050794	regulation of cellular process	2.09e-06	0.000439	2.1	26	[E(spl)m5-HLH - enhancer of split m5, helix-loop-helix, Ilp4 - insulin-like peptide 4, Bsg25A - blastoderm-specific gene 25a, ac - achaete, Z600 - cg17962 gene product from transcript cg17962-ra, os - outstretched, run - runt, Bro - brother, esg - escargot, Ocho - cg3396 gene product from transcript cg3396-rb, Brd - bearded, Tom - twin of m4, sna - snail, h - hairy, mas - masquerade, tld - tolloi…
NC 9-10	GO:0009880	embryonic pattern specification	2.85e-06	0.000581	14.16	6	[tll - tailless, slp1 - sloppy paired 1, tld - tolloid, scw - screw, eve - even skipped, os - outstretched]
NC 9-10	GO:0051252	regulation of RNA metabolic process	3.15e-06	0.000621	3.38	16	[h - hairy, E(spl)m5-HLH - enhancer of split m5, helix-loop-helix, tld - tolloid, Bsg25A - blastoderm-specific gene 25a, scw - screw, ato - atonal, ac - achaete, eve - even skipped, run - runt, zen - zerknullt, Bro - brother, SNCF - soxneuro co-factor, tll - tailless, esg - escargot, slp1 - sloppy paired 1, sna - snail]
NC 9-10	GO:2000112	regulation of cellular macromolecule biosynthetic process	3.8e-06	0.000726	3.33	16	[h - hairy, E(spl)m5-HLH - enhancer of split m5, helix-loop-helix, tld - tolloid, Bsg25A - blastoderm-specific gene 25a, scw - screw, ato - atonal, ac - achaete, eve - even skipped, run - runt, zen - zerknullt, Bro - brother, SNCF - soxneuro co-factor, tll - tailless, esg - escargot, slp1 - sloppy paired 1, sna - snail]
NC 9-10	GO:0010556	regulation of macromolecule biosynthetic process	4.08e-06	0.000755	3.32	16	[h - hairy, E(spl)m5-HLH - enhancer of split m5, helix-loop-helix, tld - tolloid, Bsg25A - blastoderm-specific gene 25a, scw - screw, ato - atonal, ac - achaete, eve - even skipped, run - runt, zen - zerknullt, Bro - brother, SNCF - soxneuro co-factor, tll - tailless, esg - escargot, slp1 - sloppy paired 1, sna - snail]
NC 9-10	GO:0003002	regionalization	4.69e-06	0.000843	7.89	8	[h - hairy, E(spl)m5-HLH - enhancer of split m5, helix-loop-helix, slp1 - sloppy paired 1, scw - screw, srw - shrew, eve - even skipped, os - outstretched, run - runt]
NC 9-10	GO:0009952	anterior/posterior pattern specification	5.08e-06	0.000887	32.1	4	[h - hairy, E(spl)m5-HLH - enhancer of split m5, helix-loop-helix, eve - even skipped, run - runt]
NC 9-10	GO:0019219	regulation of nucleobase-containing compound metabolic process	6.14e-06	0.00104	3.22	16	[h - hairy, E(spl)m5-HLH - enhancer of split m5, helix-loop-helix, tld - tolloid, Bsg25A - blastoderm-specific gene 25a, scw - screw, ato - atonal, ac - achaete, eve - even skipped, run - runt, zen - zerknullt, Bro - brother, SNCF - soxneuro co-factor, tll - tailless, esg - escargot, slp1 - sloppy paired 1, sna - snail]
NC 9-10	GO:0009889	regulation of biosynthetic process	6.42e-06	0.00106	3.2	16	[h - hairy, E(spl)m5-HLH - enhancer of split m5, helix-loop-helix, tld - tolloid, Bsg25A - blastoderm-specific gene 25a, scw - screw, ato - atonal, ac - achaete, eve - even skipped, run - runt, zen - zerknullt, Bro - brother, SNCF - soxneuro co-factor, tll - tailless, esg - escargot, slp1 - sloppy paired 1, sna - snail]
NC 9-10	GO:0031326	regulation of cellular biosynthetic process	6.42e-06	0.00103	3.2	16	[h - hairy, E(spl)m5-HLH - enhancer of split m5, helix-loop-helix, tld - tolloid, Bsg25A - blastoderm-specific gene 25a, scw - screw, ato - atonal, ac - achaete, eve - even skipped, run - runt, zen - zerknullt, Bro - brother, SNCF - soxneuro co-factor, tll - tailless, esg - escargot, slp1 - sloppy paired 1, sna - snail]
NC 9-10	GO:0010468	regulation of gene expression	1.6e-05	0.0025	2.82	17	[h - hairy, E(spl)m5-HLH - enhancer of split m5, helix-loop-helix, tld - tolloid, ato - atonal, Bsg25A - blastoderm-specific gene 25a, scw - screw, ac - achaete, eve - even skipped, run - runt, zen - zerknullt, Bro - brother, SNCF - soxneuro co-factor, tll - tailless, esg - escargot, slp1 - sloppy paired 1, sna - snail, srw - shrew]
NC 9-10	GO:0009798	axis specification	2.56e-05	0.00391	9.76	6	[slp1 - sloppy paired 1, tld - tolloid, scw - screw, sna - snail, eve - even skipped, zen - zerknullt]
NC 9-10	GO:0010629	negative regulation of gene expression	2.73e-05	0.00407	4.68	10	[h - hairy, slp1 - sloppy paired 1, esg - escargot, tld - tolloid, scw - screw, sna - snail, srw - shrew, eve - even skipped, run - runt, zen - zerknullt]
NC 9-10	GO:0048598	embryonic morphogenesis	2.77e-05	0.00403	9.63	6	[spo - spook, sna - snail, CG13427 - cg13427 gene product from transcript cg13427-ra, eve - even skipped, Z600 - cg17962 gene product from transcript cg17962-ra, run - runt]
NC 9-10	GO:1902680	positive regulation of RNA biosynthetic process	2.81e-05	0.00399	5.31	9	[SNCF - soxneuro co-factor, tll - tailless, esg - escargot, ato - atonal, ac - achaete, sna - snail, eve - even skipped, run - runt, zen - zerknullt]
NC 9-10	GO:0045893	positive regulation of transcription, DNA-templated	2.81e-05	0.0039	5.31	9	[SNCF - soxneuro co-factor, tll - tailless, esg - escargot, ato - atonal, ac - achaete, sna - snail, eve - even skipped, run - runt, zen - zerknullt]
NC 9-10	GO:1903508	positive regulation of nucleic acid-templated transcription	2.81e-05	0.00381	5.31	9	[SNCF - soxneuro co-factor, tll - tailless, esg - escargot, ato - atonal, ac - achaete, sna - snail, eve - even skipped, run - runt, zen - zerknullt]
NC 9-10	GO:0048103	somatic stem cell division	3.14e-05	0.00418	20.94	4	[tll - tailless, esg - escargot, sna - snail, os - outstretched]
NC 9-10	GO:0051254	positive regulation of RNA metabolic process	4.43e-05	0.00576	5.02	9	[SNCF - soxneuro co-factor, tll - tailless, esg - escargot, ato - atonal, ac - achaete, sna - snail, eve - even skipped, run - runt, zen - zerknullt]
NC 9-10	GO:0009887	animal organ morphogenesis	4.85e-05	0.00617	6.91	7	[h - hairy, tll - tailless, ato - atonal, ac - achaete, eve - even skipped, os - outstretched, run - runt]
NC 9-10	GO:0001756	somitogenesis	6.7e-05	0.00835	120.38	2	[h - hairy, E(spl)m5-HLH - enhancer of split m5, helix-loop-helix]
NC 9-10	GO:0001746	Bolwig's organ morphogenesis	6.7e-05	0.00818	120.38	2	[tll - tailless, ato - atonal]
NC 9-10	GO:0035287	head segmentation	6.7e-05	0.00802	120.38	2	[h - hairy, eve - even skipped]
NC 9-10	GO:0035289	posterior head segmentation	6.7e-05	0.00787	120.38	2	[h - hairy, eve - even skipped]
NC 9-10	GO:0007540	sex determination, establishment of X:A ratio	6.7e-05	0.00772	120.38	2	[os - outstretched, run - runt]
NC 9-10	GO:0045935	positive regulation of nucleobase-containing compound metabolic process	6.8e-05	0.00769	4.75	9	[SNCF - soxneuro co-factor, tll - tailless, esg - escargot, ato - atonal, ac - achaete, sna - snail, eve - even skipped, run - runt, zen - zerknullt]
NC 9-10	GO:0007369	gastrulation	8.26e-05	0.00917	32.83	3	[sna - snail, CG13427 - cg13427 gene product from transcript cg13427-ra, Z600 - cg17962 gene product from transcript cg17962-ra]
NC 9-10	GO:0010557	positive regulation of macromolecule biosynthetic process	8.33e-05	0.00908	4.63	9	[SNCF - soxneuro co-factor, tll - tailless, esg - escargot, ato - atonal, ac - achaete, sna - snail, eve - even skipped, run - runt, zen - zerknullt]
NC 9-10	GO:0090100	positive regulation of transmembrane receptor protein serine/threonine kinase signaling pathway	0.00011	0.0117	30.1	3	[tld - tolloid, scw - screw, srw - shrew]
NC 9-10	GO:0007350	blastoderm segmentation	0.00011	0.0115	30.1	3	[slp1 - sloppy paired 1, eve - even skipped, os - outstretched]
NC 9-10	GO:0009891	positive regulation of biosynthetic process	0.000144	0.0149	4.32	9	[SNCF - soxneuro co-factor, tll - tailless, esg - escargot, ato - atonal, ac - achaete, sna - snail, eve - even skipped, run - runt, zen - zerknullt]
NC 9-10	GO:0031328	positive regulation of cellular biosynthetic process	0.000144	0.0146	4.32	9	[SNCF - soxneuro co-factor, tll - tailless, esg - escargot, ato - atonal, ac - achaete, sna - snail, eve - even skipped, run - runt, zen - zerknullt]
NC 9-10	GO:0010628	positive regulation of gene expression	0.000172	0.0172	4.22	9	[SNCF - soxneuro co-factor, tll - tailless, esg - escargot, ato - atonal, ac - achaete, sna - snail, eve - even skipped, run - runt, zen - zerknullt]
NC 9-10	GO:0001748	optic lobe placode development	0.0002	0.0197	80.25	2	[tll - tailless, ato - atonal]
NC 9-10	GO:0035290	trunk segmentation	0.0002	0.0194	80.25	2	[h - hairy, eve - even skipped]
NC 9-10	GO:0007460	R8 cell fate commitment	0.0002	0.0191	80.25	2	[h - hairy, ato - atonal]
NC 9-10	GO:0010605	negative regulation of macromolecule metabolic process	0.000208	0.0195	3.69	10	[h - hairy, slp1 - sloppy paired 1, esg - escargot, tld - tolloid, scw - screw, sna - snail, srw - shrew, eve - even skipped, run - runt, zen - zerknullt]
NC 9-10	GO:0008595	anterior/posterior axis specification, embryo	0.000223	0.0206	24.08	3	[slp1 - sloppy paired 1, scw - screw, eve - even skipped]
NC 9-10	GO:0035239	tube morphogenesis	0.000224	0.0204	8.72	5	[h - hairy, esg - escargot, ato - atonal, sna - snail, os - outstretched]
NC 9-10	GO:0001700	embryonic development via the syncytial blastoderm	0.000273	0.0245	22.57	3	[spo - spook, Bsg25A - blastoderm-specific gene 25a, os - outstretched]
NC 9-10	GO:0000122	negative regulation of transcription by RNA polymerase II	0.000292	0.0259	8.25	5	[h - hairy, slp1 - sloppy paired 1, esg - escargot, sna - snail, eve - even skipped]
NC 9-10	GO:0007165	signal transduction	0.000331	0.0289	3.49	10	[h - hairy, E(spl)m5-HLH - enhancer of split m5, helix-loop-helix, Ilp4 - insulin-like peptide 4, CG13465 - cg13465 gene product from transcript cg13465-ra, Ocho - cg3396 gene product from transcript cg3396-rb, scw - screw, BobA - brother of bearded a, Brd - bearded, Tom - twin of m4, os - outstretched]
NC 9-10	GO:0048518	positive regulation of biological process	0.000332	0.0285	2.47	15	[mas - masquerade, tld - tolloid, Bsg25A - blastoderm-specific gene 25a, scw - screw, ato - atonal, ac - achaete, eve - even skipped, os - outstretched, run - runt, zen - zerknullt, SNCF - soxneuro co-factor, tll - tailless, esg - escargot, sna - snail, srw - shrew]
NC 9-10	GO:0048592	eye morphogenesis	0.000356	0.0302	11.46	4	[tll - tailless, ato - atonal, os - outstretched, run - runt]
NC 9-10	GO:0090596	sensory organ morphogenesis	0.000356	0.0297	11.46	4	[tll - tailless, ato - atonal, os - outstretched, run - runt]
NC 9-10	GO:0009892	negative regulation of metabolic process	0.000364	0.03	3.45	10	[h - hairy, slp1 - sloppy paired 1, esg - escargot, tld - tolloid, scw - screw, sna - snail, srw - shrew, eve - even skipped, run - runt, zen - zerknullt]
NC 9-10	GO:0048522	positive regulation of cellular process	0.000364	0.0297	2.58	14	[mas - masquerade, tld - tolloid, Bsg25A - blastoderm-specific gene 25a, scw - screw, ato - atonal, ac - achaete, eve - even skipped, run - runt, zen - zerknullt, tll - tailless, SNCF - soxneuro co-factor, esg - escargot, sna - snail, srw - shrew]
NC 9-10	GO:0060255	regulation of macromolecule metabolic process	0.000371	0.0298	2.23	17	[h - hairy, E(spl)m5-HLH - enhancer of split m5, helix-loop-helix, tld - tolloid, Bsg25A - blastoderm-specific gene 25a, ato - atonal, scw - screw, ac - achaete, eve - even skipped, run - runt, zen - zerknullt, Bro - brother, tll - tailless, SNCF - soxneuro co-factor, slp1 - sloppy paired 1, esg - escargot, sna - snail, srw - shrew]
NC 9-10	GO:0051171	regulation of nitrogen compound metabolic process	0.000508	0.0403	2.27	16	[h - hairy, E(spl)m5-HLH - enhancer of split m5, helix-loop-helix, tld - tolloid, Bsg25A - blastoderm-specific gene 25a, ato - atonal, scw - screw, ac - achaete, eve - even skipped, run - runt, zen - zerknullt, Bro - brother, tll - tailless, SNCF - soxneuro co-factor, slp1 - sloppy paired 1, esg - escargot, sna - snail]
NC 9-10	GO:0051173	positive regulation of nitrogen compound metabolic process	0.000512	0.0401	3.31	10	[SNCF - soxneuro co-factor, tll - tailless, esg - escargot, scw - screw, ato - atonal, ac - achaete, sna - snail, eve - even skipped, run - runt, zen - zerknullt]
NC 9-10	GO:0080090	regulation of primary metabolic process	0.000537	0.0415	2.26	16	[h - hairy, E(spl)m5-HLH - enhancer of split m5, helix-loop-helix, tld - tolloid, Bsg25A - blastoderm-specific gene 25a, ato - atonal, scw - screw, ac - achaete, eve - even skipped, run - runt, zen - zerknullt, Bro - brother, tll - tailless, SNCF - soxneuro co-factor, slp1 - sloppy paired 1, esg - escargot, sna - snail]
NC 9-10	GO:0036445	neuronal stem cell division	0.000542	0.0414	18.06	3	[tll - tailless, esg - escargot, sna - snail]
NC 9-10	GO:0055057	neuroblast division	0.000542	0.0409	18.06	3	[tll - tailless, esg - escargot, sna - snail]
NC 9-10	GO:0031325	positive regulation of cellular metabolic process	0.000596	0.0444	3.24	10	[SNCF - soxneuro co-factor, tll - tailless, esg - escargot, scw - screw, ato - atonal, ac - achaete, sna - snail, eve - even skipped, run - runt, zen - zerknullt]
NC 9-10	GO:0017145	stem cell division	0.000597	0.0439	10.03	4	[tll - tailless, esg - escargot, sna - snail, os - outstretched]
NC 9-10	GO:0007377	germ-band extension	0.000659	0.0479	48.15	2	[eve - even skipped, run - runt]
NC 9-10	GO:0007400	neuroblast fate determination	0.000659	0.0474	48.15	2	[ac - achaete, run - runt]
NC 9-10	GO:0010604	positive regulation of macromolecule metabolic process	0.000692	0.0492	3.18	10	[SNCF - soxneuro co-factor, tll - tailless, esg - escargot, scw - screw, ato - atonal, ac - achaete, sna - snail, eve - even skipped, run - runt, zen - zerknullt]
NC 9-10	GO:0000578	embryonic axis specification	0.000724	0.0508	16.42	3	[slp1 - sloppy paired 1, scw - screw, eve - even skipped]
NC 9-10	GO:0031323	regulation of cellular metabolic process	0.000725	0.0503	2.2	16	[h - hairy, E(spl)m5-HLH - enhancer of split m5, helix-loop-helix, tld - tolloid, Bsg25A - blastoderm-specific gene 25a, ato - atonal, scw - screw, ac - achaete, eve - even skipped, run - runt, zen - zerknullt, Bro - brother, tll - tailless, SNCF - soxneuro co-factor, slp1 - sloppy paired 1, esg - escargot, sna - snail]
NC 9-10	GO:0019222	regulation of metabolic process	0.000817	0.056	2.09	17	[h - hairy, E(spl)m5-HLH - enhancer of split m5, helix-loop-helix, tld - tolloid, Bsg25A - blastoderm-specific gene 25a, ato - atonal, scw - screw, ac - achaete, eve - even skipped, run - runt, zen - zerknullt, Bro - brother, tll - tailless, SNCF - soxneuro co-factor, slp1 - sloppy paired 1, esg - escargot, sna - snail, srw - shrew]
NC 9-10	GO:0009790	embryo development	0.000828	0.0562	15.7	3	[spo - spook, Bsg25A - blastoderm-specific gene 25a, os - outstretched]
NC 9-10	GO:0009792	embryo development ending in birth or egg hatching	0.000828	0.0556	15.7	3	[spo - spook, Bsg25A - blastoderm-specific gene 25a, os - outstretched]
NC 9-10	GO:0007365	periodic partitioning	0.000828	0.055	15.7	3	[h - hairy, eve - even skipped, run - runt]
NC 9-10	GO:0048867	stem cell fate determination	0.000984	0.0646	40.13	2	[ac - achaete, run - runt]
NC 9-10	GO:0007455	eye-antennal disc morphogenesis	0.000984	0.0639	40.13	2	[ato - atonal, os - outstretched]
Syncytial blastoderm	GO:0048513	animal organ development	3.12e-15	2.02e-11	2.22	93	[d - dachs, en - engrailed, retn - retained, rib - ribbon, E(spl)m3-HLH - enhancer of split m3, helix-loop-helix, E(spl)malpha-BFM - enhancer of split malpha, bearded family member, Doc3 - dorsocross3, noc - no ocelli, oc - ocelliless, Gp150 - cg5820 gene product from transcript cg5820-ra, LanA - laminin a, ci - cubitus interruptus, Mmp1 - matrix metalloproteinase 1, sog - short gastrulation, htl…
Syncytial blastoderm	GO:0032501	multicellular organismal process	1.51e-13	4.9e-10	1.69	160	[E(spl)m3-HLH - enhancer of split m3, helix-loop-helix, nemy - no extended memory, kni - knirps, nkd - naked cuticle, Mmp1 - matrix metalloproteinase 1, prd - paired, Nha1 - na[+]/h[+] hydrogen antiporter 1, CG9313 - cg9313 gene product from transcript cg9313-ra, pnr - pannier, Hsp68 - heat shock protein 68, brk - brinker, ems - empty spiracles, elav - embryonic lethal abnormal vision, CG10730 - …
Syncytial blastoderm	GO:0009888	tissue development	1.91e-13	4.11e-10	2.8	53	[d - dachs, en - engrailed, Doc3 - dorsocross3, noc - no ocelli, Spn88Eb - serpin 88eb, LanA - laminin a, Mmp1 - matrix metalloproteinase 1, ci - cubitus interruptus, sog - short gastrulation, htl - heartless, wb - wing blister, pnr - pannier, bib - big brain, brk - brinker, Ser - serrate, Sep5 - septin 5, tup - tailup, Doc1 - dorsocross1, dac - dachshund, Doc2 - dorsocross2, vnd - ventral nervou…
Syncytial blastoderm	GO:0030154	cell differentiation	2.18e-13	3.53e-10	2.86	51	[E(spl)m3-HLH - enhancer of split m3, helix-loop-helix, retn - retained, daw - dawdle, Doc3 - dorsocross3, htl - heartless, pnr - pannier, Ser - serrate, ems - empty spiracles, Doc1 - dorsocross1, Doc2 - dorsocross2, dac - dachshund, vnd - ventral nervous system defective, Sxl - sex lethal, pyr - pyramus, hb - hunchback, wntD - wnt inhibitor of dorsal, cas - castor, dpn - deadpan, rho - rhomboid,…
Syncytial blastoderm	GO:0048731	system development	3.1e-13	4.01e-10	2.84	51	[sad - shadow, sick - sickie, rib - ribbon, noc - no ocelli, oc - ocelliless, Mmp1 - matrix metalloproteinase 1, htl - heartless, Nrt - neurotactin, bib - big brain, brk - brinker, dib - disembodied, ems - empty spiracles, elav - embryonic lethal abnormal vision, Dr - drop, vnd - ventral nervous system defective, W - wrinkled, cas - castor, Lac - lachesin, Mipp1 - multiple inositol polyphosphate …
Syncytial blastoderm	GO:0009653	anatomical structure morphogenesis	1.2e-12	1.29e-09	1.86	115	[sad - shadow, sick - sickie, rib - ribbon, LanA - laminin a, Mmp1 - matrix metalloproteinase 1, pnr - pannier, brk - brinker, dib - disembodied, ems - empty spiracles, cv-2 - crossveinless 2, jbug - jitterbug, rpr - reaper, rst - roughest, dac - dachshund, ckn - caskin, Dr - drop, W - wrinkled, Lac - lachesin, Ptx1 - cg1447 gene product from transcript cg1447-rc, byn - brachyenteron, Kr - kruppe…
Syncytial blastoderm	GO:0003002	regionalization	4.13e-12	3.82e-09	2.49	58	[inv - invected, E(spl)m3-HLH - enhancer of split m3, helix-loop-helix, en - engrailed, retn - retained, kni - knirps, oc - ocelliless, GEFmeso - guanine nucleotide exchange factor in mesoderm, nkd - naked cuticle, prd - paired, ci - cubitus interruptus, pnr - pannier, brk - brinker, Ser - serrate, ems - empty spiracles, cv-2 - crossveinless 2, CG8369 - cg8369 gene product from transcript cg8369-…
Syncytial blastoderm	GO:0048856	anatomical structure development	4.29e-12	3.47e-09	1.65	154	[sad - shadow, sick - sickie, E(spl)m3-HLH - enhancer of split m3, helix-loop-helix, rib - ribbon, Doc3 - dorsocross3, E(spl)malpha-BFM - enhancer of split malpha, bearded family member, LanA - laminin a, Mmp1 - matrix metalloproteinase 1, wb - wing blister, pnr - pannier, bib - big brain, brk - brinker, Sep5 - septin 5, dib - disembodied, elav - embryonic lethal abnormal vision, ems - empty spir…
Syncytial blastoderm	GO:0007389	pattern specification process	7.79e-12	5.6e-09	2.14	77	[upd2 - unpaired 2, inv - invected, en - engrailed, retn - retained, E(spl)m3-HLH - enhancer of split m3, helix-loop-helix, kni - knirps, oc - ocelliless, GEFmeso - guanine nucleotide exchange factor in mesoderm, nkd - naked cuticle, ci - cubitus interruptus, sog - short gastrulation, prd - paired, pnr - pannier, brk - brinker, Ser - serrate, ems - empty spiracles, cv-2 - crossveinless 2, CG8369 …
Syncytial blastoderm	GO:0048867	stem cell fate determination	4.38e-11	2.83e-08	6.16	15	[mid - midline, inv - invected, cas - castor, en - engrailed, abd-A - abdominal a, nub - nubbin, mira - miranda, hkb - huckebein, Kr - kruppel, grh - grainy head, pros - prospero, vnd - ventral nervous system defective, Dr - drop, hb - hunchback, insc - inscuteable]
Syncytial blastoderm	GO:0032502	developmental process	5.41e-11	3.18e-08	1.46	208	[Doc3 - dorsocross3, bib - big brain, brk - brinker, dib - disembodied, elav - embryonic lethal abnormal vision, ems - empty spiracles, cv-2 - crossveinless 2, Doc1 - dorsocross1, vfl - vielfaltig, Doc2 - dorsocross2, dac - dachshund, vnd - ventral nervous system defective, Dr - drop, hb - hunchback, wntD - wnt inhibitor of dorsal, Lac - lachesin, Ptx1 - cg1447 gene product from transcript cg1447…
Syncytial blastoderm	GO:0035295	tube development	5.53e-11	2.98e-08	2.9	40	[sad - shadow, d - dachs, Egfr - epidermal growth factor receptor, mid - midline, hh - hedgehog, tsh - teashirt, en - engrailed, Doc3 - dorsocross3, noc - no ocelli, bowl - brother of odd with entrails limited, drm - drumstick, ci - cubitus interruptus, sog - short gastrulation, pnr - pannier, brk - brinker, Ser - serrate, Sep5 - septin 5, dib - disembodied, sli - slit, shn - schnurri, tup - tail…
Syncytial blastoderm	GO:0001708	cell fate specification	6.87e-11	3.42e-08	4.57	21	[Egfr - epidermal growth factor receptor, mid - midline, hh - hedgehog, E(spl)malpha-BFM - enhancer of split malpha, bearded family member, abd-A - abdominal a, nkd - naked cuticle, hkb - huckebein, htl - heartless, Ubx - ultrabithorax, salm - spalt major, rho - rhomboid, lea - leak, twi - twist, Antp - antennapedia, ftz - fushi tarazu, tup - tailup, pros - prospero, dac - dachshund, melt - melte…
Syncytial blastoderm	GO:0001709	cell fate determination	7.37e-11	3.4e-08	3.25	33	[inv - invected, mid - midline, Egfr - epidermal growth factor receptor, en - engrailed, htl - heartless, neur - neuralized, pnr - pannier, uif - uninflatable, phyl - phyllopod, grh - grainy head, tup - tailup, klu - klumpfuss, stumps - cg31317 gene product from transcript cg31317-rc, vnd - ventral nervous system defective, Dr - drop, hb - hunchback, tsl - torso-like, cas - castor, abd-A - abdomi…
Syncytial blastoderm	GO:0007411	axon guidance	2.53e-10	1.09e-07	2.6	45	[sad - shadow, mid - midline, drl - derailed, retn - retained, en - engrailed, daw - dawdle, nvy - nervy, LanA - laminin a, gogo - golden goal, side - sidestep, Nrt - neurotactin, sli - slit, tup - tailup, jbug - jitterbug, sim - single-minded, ptc - patched, nerfin-1 - nervous fingers 1, dac - dachshund, eya - eyes absent, ckn - caskin, robo - roundabout, ko - knockout, gt - giant, comm2 - cg755…
Syncytial blastoderm	GO:0009952	anterior/posterior pattern specification	3.06e-10	1.24e-07	4.68	19	[inv - invected, en - engrailed, hh - hedgehog, E(spl)m3-HLH - enhancer of split m3, helix-loop-helix, retn - retained, odd - odd skipped, oc - ocelliless, abd-A - abdominal a, dpn - deadpan, prd - paired, ci - cubitus interruptus, Ubx - ultrabithorax, Antp - antennapedia, ftz - fushi tarazu, shn - schnurri, E(spl)m7-HLH - enhancer of split m7, helix-loop-helix, ptc - patched, sob - sister of odd…
Syncytial blastoderm	GO:0006928	movement of cell or subcellular component	3.34e-10	1.27e-07	1.94	83	[sad - shadow, en - engrailed, retn - retained, rib - ribbon, daw - dawdle, knrl - knirps-like, kni - knirps, LanA - laminin a, side - sidestep, htl - heartless, Nrt - neurotactin, CG9313 - cg9313 gene product from transcript cg9313-ra, tup - tailup, jbug - jitterbug, ptc - patched, dac - dachshund, ckn - caskin, pyr - pyramus, wntD - wnt inhibitor of dorsal, CG9279 - cg9279 gene product from tra…
Syncytial blastoderm	GO:0051606	detection of stimulus	4.78e-10	1.72e-07	3.96	23	[cry - cryptochrome, Rh4 - rhodopsin 4, laza - lazaro, ninaD - neither inactivation nor afterpotential d, ogre - optic ganglion reduced, ninaB - neither inactivation nor afterpotential b, Or85f - odorant receptor 85f, Ir75b - cg42643 gene product from transcript cg42643-ra, Or22b - odorant receptor 22b, nan - nanchung, Or22a - odorant receptor 22a, brv2 - brivido-2, CG9236 - cg9236 gene product f…
Syncytial blastoderm	GO:0097485	neuron projection guidance	5.26e-10	1.79e-07	2.52	46	[sad - shadow, mid - midline, drl - derailed, retn - retained, en - engrailed, daw - dawdle, nvy - nervy, LanA - laminin a, gogo - golden goal, side - sidestep, Nrt - neurotactin, sli - slit, tup - tailup, jbug - jitterbug, sim - single-minded, ptc - patched, nerfin-1 - nervous fingers 1, dac - dachshund, eya - eyes absent, ckn - caskin, robo - roundabout, ko - knockout, gt - giant, comm2 - cg755…
Syncytial blastoderm	GO:0007419	ventral cord development	2.74e-09	8.88e-07	3.7	23	[gbb - glass bottom boat, cas - castor, oc - ocelliless, nub - nubbin, mira - miranda, Mmp1 - matrix metalloproteinase 1, htl - heartless, neur - neuralized, Kr - kruppel, lea - leak, Antp - antennapedia, grh - grainy head, ems - empty spiracles, sim - single-minded, dimm - dimmed, pros - prospero, 18w - 18 wheeler, wor - worniu, eya - eyes absent, Dr - drop, vnd - ventral nervous system defectiv…
Syncytial blastoderm	GO:0048869	cellular developmental process	3.13e-09	9.63e-07	1.63	122	[sick - sickie, E(spl)m3-HLH - enhancer of split m3, helix-loop-helix, E(spl)malpha-BFM - enhancer of split malpha, bearded family member, Doc3 - dorsocross3, nkd - naked cuticle, LanA - laminin a, pnr - pannier, bib - big brain, uif - uninflatable, ems - empty spiracles, elav - embryonic lethal abnormal vision, rpr - reaper, rst - roughest, Doc1 - dorsocross1, skl - sickle, Doc2 - dorsocross2, d…
Syncytial blastoderm	GO:0007417	central nervous system development	5.26e-09	1.55e-06	4	20	[sad - shadow, mid - midline, rib - ribbon, cas - castor, oc - ocelliless, hkb - huckebein, htl - heartless, Nrt - neurotactin, D - dichaete, Ror - cg4926 gene product from transcript cg4926-ra, ftz - fushi tarazu, opa - odd paired, dib - disembodied, elav - embryonic lethal abnormal vision, pros - prospero, siz - schizo, wor - worniu, Dr - drop, vnd - ventral nervous system defective, SoxN - sox…
Syncytial blastoderm	GO:0048732	gland development	6.95e-09	1.96e-06	4.49	17	[Egfr - epidermal growth factor receptor, retn - retained, tsh - teashirt, rib - ribbon, fkh - fork head, hkb - huckebein, sog - short gastrulation, htl - heartless, pnr - pannier, sage - salivary gland-expressed bhlh, Ser - serrate, Antp - antennapedia, tup - tailup, srp - serpent, dpp - decapentaplegic, hb - hunchback, gt - giant]
Syncytial blastoderm	GO:0045165	cell fate commitment	1.28e-08	3.46e-06	3.05	28	[ham - hamlet, Egfr - epidermal growth factor receptor, mid - midline, noc - no ocelli, oc - ocelliless, htl - heartless, phyl - phyllopod, grh - grainy head, sim - single-minded, Doc1 - dorsocross1, ptc - patched, wor - worniu, stumps - cg31317 gene product from transcript cg31317-rc, pyr - pyramus, Blimp-1 - cg5249 gene product from transcript cg5249-rb, wntD - wnt inhibitor of dorsal, abd-A - …
Syncytial blastoderm	GO:0048608	reproductive structure development	1.35e-08	3.49e-06	4.16	18	[mid - midline, Egfr - epidermal growth factor receptor, rib - ribbon, en - engrailed, hh - hedgehog, abd-A - abdominal a, htl - heartless, wb - wing blister, salm - spalt major, LanB1 - cg7123 gene product from transcript cg7123-ra, lea - leak, ftz - fushi tarazu, sli - slit, stl - stall, ptc - patched, eya - eyes absent, robo - roundabout, Dr - drop]
Syncytial blastoderm	GO:0035287	head segmentation	1.44e-08	3.58e-06	7.4	9	[hh - hedgehog, en - engrailed, ftz - fushi tarazu, ems - empty spiracles, oc - ocelliless, btd - buttonhead, hb - hunchback, gcm - glial cells missing, gt - giant]
Syncytial blastoderm	GO:0007398	ectoderm development	1.86e-08	4.45e-06	6.72	10	[bib - big brain, hh - hedgehog, shn - schnurri, sim - single-minded, vnd - ventral nervous system defective, Dr - drop, sog - short gastrulation, dpp - decapentaplegic, neur - neuralized, pnr - pannier]
Syncytial blastoderm	GO:0000122	negative regulation of transcription by RNA polymerase II	2.67e-08	6.16e-06	2.56	36	[mid - midline, retn - retained, en - engrailed, tsh - teashirt, odd - odd skipped, fkh - fork head, kni - knirps, bowl - brother of odd with entrails limited, oc - ocelliless, drm - drumstick, pnr - pannier, brk - brinker, shn - schnurri, btd - buttonhead, klu - klumpfuss, sob - sister of odd and bowl, vnd - ventral nervous system defective, hb - hunchback, Blimp-1 - cg5249 gene product from tra…
Syncytial blastoderm	GO:0050906	detection of stimulus involved in sensory perception	2.78e-08	6.2e-06	4.93	14	[cry - cryptochrome, Or85f - odorant receptor 85f, Ir75b - cg42643 gene product from transcript cg42643-ra, nan - nanchung, Or22b - odorant receptor 22b, Or22a - odorant receptor 22a, brv2 - brivido-2, Ac78C - adenylyl cyclase 78c, CG9317 - cg9317 gene product from transcript cg9317-ra, Gr59e - gustatory receptor 59e, stj - straightjacket, Ir75a - ionotropic receptor 75a, Ir75c - cg42642 gene pro…
Syncytial blastoderm	GO:0048565	digestive tract development	3.68e-08	7.93e-06	5.55	12	[sad - shadow, tsh - teashirt, Antp - antennapedia, opa - odd paired, dib - disembodied, shn - schnurri, abd-A - abdominal a, srp - serpent, drm - drumstick, Ubx - ultrabithorax, byn - brachyenteron, emc - extra macrochaetae]
Syncytial blastoderm	GO:0060429	epithelium development	5.18e-08	1.08e-05	2.62	33	[d - dachs, Egfr - epidermal growth factor receptor, mid - midline, en - engrailed, hh - hedgehog, tsh - teashirt, Doc3 - dorsocross3, noc - no ocelli, bowl - brother of odd with entrails limited, Spn88Eb - serpin 88eb, ci - cubitus interruptus, sog - short gastrulation, pnr - pannier, brk - brinker, Ser - serrate, Sep5 - septin 5, sli - slit, tup - tailup, Doc1 - dorsocross1, Doc2 - dorsocross2,…
Syncytial blastoderm	GO:0007447	imaginal disc pattern formation	5.98e-08	1.21e-05	3	26	[gbb - glass bottom boat, mid - midline, inv - invected, Egfr - epidermal growth factor receptor, en - engrailed, hh - hedgehog, l(2)08717 - lethal (2) 08717, tsh - teashirt, tara - taranis, nab - cg33545 gene product from transcript cg33545-rc, disco - disconnected, ci - cubitus interruptus, shn - schnurri, CG8369 - cg8369 gene product from transcript cg8369-rc, ptc - patched, Mrp4 - multidrug r…
Syncytial blastoderm	GO:0007431	salivary gland development	6.31e-08	1.24e-05	5.81	11	[Ser - serrate, sage - salivary gland-expressed bhlh, Egfr - epidermal growth factor receptor, rib - ribbon, tsh - teashirt, retn - retained, fkh - fork head, hkb - huckebein, hb - hunchback, htl - heartless, gt - giant]
Syncytial blastoderm	GO:0007400	neuroblast fate determination	6.31e-08	1.2e-05	5.81	11	[Kr - kruppel, inv - invected, en - engrailed, pros - prospero, abd-A - abdominal a, mira - miranda, Dr - drop, vnd - ventral nervous system defective, hkb - huckebein, hb - hunchback, insc - inscuteable]
Syncytial blastoderm	GO:0014019	neuroblast development	9.79e-08	1.81e-05	6.16	10	[D - dichaete, mid - midline, cas - castor, Antp - antennapedia, ems - empty spiracles, abd-A - abdominal a, nab - cg33545 gene product from transcript cg33545-rc, klu - klumpfuss, vnd - ventral nervous system defective, dpn - deadpan]
Syncytial blastoderm	GO:0048864	stem cell development	9.79e-08	1.76e-05	6.16	10	[D - dichaete, mid - midline, cas - castor, Antp - antennapedia, ems - empty spiracles, nab - cg33545 gene product from transcript cg33545-rc, abd-A - abdominal a, klu - klumpfuss, vnd - ventral nervous system defective, dpn - deadpan]
Syncytial blastoderm	GO:0007449	proximal/distal pattern formation, imaginal disc	9.79e-08	1.71e-05	6.16	10	[rho - rhomboid, CG4221 - cg4221 gene product from transcript cg4221-ra, Egfr - epidermal growth factor receptor, hh - hedgehog, tsh - teashirt, hth - homothorax, dac - dachshund, disco - disconnected, dpp - decapentaplegic, Lim1 - cg11354 gene product from transcript cg11354-rb]
Syncytial blastoderm	GO:0007402	ganglion mother cell fate determination	1.08e-07	1.83e-05	7.4	8	[Kr - kruppel, mid - midline, cas - castor, grh - grainy head, pros - prospero, nub - nubbin, mira - miranda, hb - hunchback]
Syncytial blastoderm	GO:0007494	midgut development	2.08e-07	3.45e-05	5.42	11	[sad - shadow, tsh - teashirt, Antp - antennapedia, opa - odd paired, dib - disembodied, shn - schnurri, abd-A - abdominal a, srp - serpent, Ubx - ultrabithorax, byn - brachyenteron, emc - extra macrochaetae]
Syncytial blastoderm	GO:0007600	sensory perception	2.55e-07	4.12e-05	3.24	21	[cry - cryptochrome, Rh4 - rhodopsin 4, gk - geko, ppk19 - pickpocket 19, Tmhs - tetraspan membrane protein in hair cell stereocilia ortholog, Obp99a - odorant-binding protein 99a, Obp56a - odorant-binding protein 56a, salm - spalt major, CG9313 - cg9313 gene product from transcript cg9313-ra, Obp44a - odorant-binding protein 44a, Or22b - odorant receptor 22b, nan - nanchung, Or22a - odorant rece…
Syncytial blastoderm	GO:0009954	proximal/distal pattern formation	3.73e-07	5.88e-05	5.69	10	[rho - rhomboid, CG4221 - cg4221 gene product from transcript cg4221-ra, Egfr - epidermal growth factor receptor, hh - hedgehog, tsh - teashirt, hth - homothorax, dac - dachshund, disco - disconnected, dpp - decapentaplegic, Lim1 - cg11354 gene product from transcript cg11354-rb]
Syncytial blastoderm	GO:0009593	detection of chemical stimulus	5.84e-07	8.99e-05	5.08	11	[Or22b - odorant receptor 22b, Or22a - odorant receptor 22a, Ac78C - adenylyl cyclase 78c, Ir62a - ionotropic receptor 62a, Gr59e - gustatory receptor 59e, Ir75a - ionotropic receptor 75a, Ir75c - cg42642 gene product from transcript cg42642-ra, Ir68a - ionotropic receptor 68a, Gr66a - gustatory receptor 66a, Or85f - odorant receptor 85f, Ir75b - cg42643 gene product from transcript cg42643-ra]
Syncytial blastoderm	GO:0007498	mesoderm development	6.3e-07	9.47e-05	4.14	14	[hh - hedgehog, abd-A - abdominal a, CG9509 - cg9509 gene product from transcript cg9509-ra, LanA - laminin a, htl - heartless, neur - neuralized, bib - big brain, Msp-300 - muscle-specific protein 300, twi - twist, ftz - fushi tarazu, eya - eyes absent, stumps - cg31317 gene product from transcript cg31317-rc, dpp - decapentaplegic, pyr - pyramus]
Syncytial blastoderm	GO:0010817	regulation of hormone levels	7.04e-07	0.000103	3.41	18	[sad - shadow, daw - dawdle, GstE14 - glutathione s transferase e14, CG9512 - cg9512 gene product from transcript cg9512-ra, CG8773 - cg8773 gene product from transcript cg8773-rb, CG9514 - cg9514 gene product from transcript cg9514-ra, CG9509 - cg9509 gene product from transcript cg9509-ra, phm - phantom, Cyp18a1 - cytochrome p450-18a1, Mip - myoinhibiting peptide precursor, Jhe - juvenile hormo…
Syncytial blastoderm	GO:0035289	posterior head segmentation	8.03e-07	0.000115	7.4	7	[en - engrailed, hh - hedgehog, ftz - fushi tarazu, btd - buttonhead, gcm - glial cells missing, hb - hunchback, gt - giant]
Syncytial blastoderm	GO:0035282	segmentation	1.12e-06	0.000158	3.33	18	[en - engrailed, E(spl)m3-HLH - enhancer of split m3, helix-loop-helix, hh - hedgehog, odd - odd skipped, kni - knirps, oc - ocelliless, ci - cubitus interruptus, dpn - deadpan, pnr - pannier, Kr - kruppel, D - dichaete, Ser - serrate, ftz - fushi tarazu, hth - homothorax, ems - empty spiracles, E(spl)m7-HLH - enhancer of split m7, helix-loop-helix, sob - sister of odd and bowl, hb - hunchback]
Syncytial blastoderm	GO:0008406	gonad development	1.2e-06	0.000165	3.98	14	[Egfr - epidermal growth factor receptor, mid - midline, en - engrailed, rib - ribbon, abd-A - abdominal a, htl - heartless, wb - wing blister, salm - spalt major, LanB1 - cg7123 gene product from transcript cg7123-ra, lea - leak, sli - slit, ptc - patched, eya - eyes absent, robo - roundabout]
Syncytial blastoderm	GO:0048598	embryonic morphogenesis	1.22e-06	0.000164	2.37	32	[sad - shadow, gbb - glass bottom boat, Egfr - epidermal growth factor receptor, rib - ribbon, tsh - teashirt, odd - odd skipped, fkh - fork head, bowl - brother of odd with entrails limited, drm - drumstick, pnr - pannier, LanB1 - cg7123 gene product from transcript cg7123-ra, dib - disembodied, kuk - kugelkern, shn - schnurri, tup - tailup, sob - sister of odd and bowl, Dr - drop, W - wrinkled,…
Syncytial blastoderm	GO:0006357	regulation of transcription by RNA polymerase II	1.39e-06	0.000183	1.65	81	[bab2 - bric a brac 2, en - engrailed, retn - retained, kni - knirps, Doc3 - dorsocross3, oc - ocelliless, ci - cubitus interruptus, sog - short gastrulation, prd - paired, dmrt99B - doublesex-mab related 99b, pnr - pannier, brk - brinker, ems - empty spiracles, tup - tailup, cv-2 - crossveinless 2, Doc1 - dorsocross1, vfl - vielfaltig, Doc2 - dorsocross2, vnd - ventral nervous system defective, …
Syncytial blastoderm	GO:0045944	positive regulation of transcription by RNA polymerase II	1.58e-06	0.000204	1.96	48	[Sry-delta - serendipity delta, mid - midline, tsh - teashirt, en - engrailed, fkh - fork head, odd - odd skipped, Doc3 - dorsocross3, bowl - brother of odd with entrails limited, oc - ocelliless, disco - disconnected, drm - drumstick, ci - cubitus interruptus, prd - paired, Eip74EF - ecdysone-induced protein 74ef, pnr - pannier, sage - salivary gland-expressed bhlh, grh - grainy head, ems - empt…
Syncytial blastoderm	GO:0050907	detection of chemical stimulus involved in sensory perception	2.15e-06	0.000273	5.55	9	[Or22b - odorant receptor 22b, Or22a - odorant receptor 22a, Ac78C - adenylyl cyclase 78c, Gr59e - gustatory receptor 59e, Ir75a - ionotropic receptor 75a, Ir75c - cg42642 gene product from transcript cg42642-ra, Or85f - odorant receptor 85f, Gr66a - gustatory receptor 66a, Ir75b - cg42643 gene product from transcript cg42643-ra]
Syncytial blastoderm	GO:0035223	leg disc pattern formation	2.15e-06	0.000268	5.55	9	[rho - rhomboid, Egfr - epidermal growth factor receptor, mid - midline, tsh - teashirt, hth - homothorax, dac - dachshund, disco - disconnected, dpp - decapentaplegic, Lim1 - cg11354 gene product from transcript cg11354-rb]
Syncytial blastoderm	GO:0007420	brain development	2.67e-06	0.000326	4.01	13	[bwa - brain washing, noc - no ocelli, oc - ocelliless, disco - disconnected, rho - rhomboid, D - dichaete, ems - empty spiracles, hth - homothorax, sim - single-minded, pros - prospero, wor - worniu, Dr - drop, vnd - ventral nervous system defective]
Syncytial blastoderm	GO:0007479	leg disc proximal/distal pattern formation	3.76e-06	0.00045	5.92	8	[rho - rhomboid, Egfr - epidermal growth factor receptor, tsh - teashirt, hth - homothorax, disco - disconnected, dac - dachshund, Lim1 - cg11354 gene product from transcript cg11354-rb, dpp - decapentaplegic]
Syncytial blastoderm	GO:0035051	cardiocyte differentiation	3.76e-06	0.000442	5.92	8	[Doc3 - dorsocross3, abd-A - abdominal a, Doc1 - dorsocross1, Doc2 - dorsocross2, pyr - pyramus, dpp - decapentaplegic, htl - heartless, pnr - pannier]
Syncytial blastoderm	GO:0042445	hormone metabolic process	4.89e-06	0.000564	3.85	13	[sad - shadow, GstE14 - glutathione s transferase e14, CG9512 - cg9512 gene product from transcript cg9512-ra, CG8773 - cg8773 gene product from transcript cg8773-rb, CG9514 - cg9514 gene product from transcript cg9514-ra, CG9509 - cg9509 gene product from transcript cg9509-ra, phm - phantom, Cyp18a1 - cytochrome p450-18a1, Jhe - juvenile hormone esterase, dib - disembodied, CG15537 - cg15537 gen…
Syncytial blastoderm	GO:0007166	cell surface receptor signaling pathway	5.63e-06	0.000639	1.91	46	[gbb - glass bottom boat, Egfr - epidermal growth factor receptor, drl - derailed, hh - hedgehog, tsh - teashirt, E(spl)m3-HLH - enhancer of split m3, helix-loop-helix, daw - dawdle, E(spl)malpha-BFM - enhancer of split malpha, bearded family member, Gp150 - cg5820 gene product from transcript cg5820-ra, ci - cubitus interruptus, sog - short gastrulation, htl - heartless, CG3216 - cg3216 gene pro…
Syncytial blastoderm	GO:0048100	wing disc anterior/posterior pattern formation	5.67e-06	0.000632	6.47	7	[inv - invected, en - engrailed, hh - hedgehog, shn - schnurri, ptc - patched, dpp - decapentaplegic, ci - cubitus interruptus]
Syncytial blastoderm	GO:0007380	specification of segmental identity, head	5.99e-06	0.000656	7.4	6	[croc - crocodile, tsh - teashirt, Antp - antennapedia, hth - homothorax, gt - giant, tio - tiptop]
Syncytial blastoderm	GO:0007354	zygotic determination of anterior/posterior axis, embryo	5.99e-06	0.000645	7.4	6	[Kr - kruppel, kni - knirps, sog - short gastrulation, dpp - decapentaplegic, hb - hunchback, gt - giant]
Syncytial blastoderm	GO:0007445	determination of imaginal disc primordium	5.99e-06	0.000635	7.4	6	[rho - rhomboid, Egfr - epidermal growth factor receptor, sim - single-minded, Doc1 - dorsocross1, abd-A - abdominal a, ptc - patched]
Syncytial blastoderm	GO:0048859	formation of anatomical boundary	6.17e-06	0.000643	5.12	9	[brk - brinker, lea - leak, phyl - phyllopod, mirr - mirror, sli - slit, hth - homothorax, ft - fat, robo - roundabout, unc-5 - cg8166 gene product from transcript cg8166-ra]
Syncytial blastoderm	GO:0002009	morphogenesis of an epithelium	7.68e-06	0.000789	2.04	38	[gbb - glass bottom boat, sad - shadow, Egfr - epidermal growth factor receptor, bab2 - bric a brac 2, tsh - teashirt, hh - hedgehog, rib - ribbon, en - engrailed, fkh - fork head, odd - odd skipped, noc - no ocelli, pnr - pannier, brk - brinker, LanB1 - cg7123 gene product from transcript cg7123-ra, dib - disembodied, kuk - kugelkern, shn - schnurri, tup - tailup, ptc - patched, dac - dachshund,…
Syncytial blastoderm	GO:0006355	regulation of transcription, DNA-templated	9.87e-06	0.000998	1.44	115	[rib - ribbon, E(spl)m3-HLH - enhancer of split m3, helix-loop-helix, knrl - knirps-like, kni - knirps, Doc3 - dorsocross3, prd - paired, pnr - pannier, brk - brinker, CG34224 - cg34224 gene product from transcript cg34224-ra, ems - empty spiracles, cv-2 - crossveinless 2, Doc1 - dorsocross1, vfl - vielfaltig, Doc2 - dorsocross2, dac - dachshund, vnd - ventral nervous system defective, Dr - drop,…
Syncytial blastoderm	GO:2001141	regulation of RNA biosynthetic process	9.87e-06	0.000983	1.44	115	[rib - ribbon, E(spl)m3-HLH - enhancer of split m3, helix-loop-helix, knrl - knirps-like, kni - knirps, Doc3 - dorsocross3, prd - paired, pnr - pannier, brk - brinker, CG34224 - cg34224 gene product from transcript cg34224-ra, ems - empty spiracles, cv-2 - crossveinless 2, Doc1 - dorsocross1, vfl - vielfaltig, dac - dachshund, Doc2 - dorsocross2, vnd - ventral nervous system defective, Dr - drop,…
Syncytial blastoderm	GO:1903506	regulation of nucleic acid-templated transcription	9.87e-06	0.000968	1.44	115	[rib - ribbon, E(spl)m3-HLH - enhancer of split m3, helix-loop-helix, knrl - knirps-like, kni - knirps, Doc3 - dorsocross3, prd - paired, pnr - pannier, brk - brinker, CG34224 - cg34224 gene product from transcript cg34224-ra, ems - empty spiracles, cv-2 - crossveinless 2, Doc1 - dorsocross1, vfl - vielfaltig, dac - dachshund, Doc2 - dorsocross2, vnd - ventral nervous system defective, Dr - drop,…
Syncytial blastoderm	GO:0007606	sensory perception of chemical stimulus	1.1e-05	0.00106	3.86	12	[Obp44a - odorant-binding protein 44a, Or22b - odorant receptor 22b, Or22a - odorant receptor 22a, gk - geko, ppk19 - pickpocket 19, Obp99a - odorant-binding protein 99a, dpr19 - cg13140 gene product from transcript cg13140-rb, Gr59e - gustatory receptor 59e, pros - prospero, Gr66a - gustatory receptor 66a, Obp56a - odorant-binding protein 56a, G-salpha60A - g protein salpha 60a]
Syncytial blastoderm	GO:0009886	post-embryonic animal morphogenesis	1.11e-05	0.00105	1.81	50	[d - dachs, bab2 - bric a brac 2, en - engrailed, oc - ocelliless, GEFmeso - guanine nucleotide exchange factor in mesoderm, sog - short gastrulation, Mmp1 - matrix metalloproteinase 1, brk - brinker, Ser - serrate, ImpE2 - ecdysone-inducible gene e2, cv-2 - crossveinless 2, rpr - reaper, ptc - patched, dac - dachshund, Dr - drop, Lim1 - cg11354 gene product from transcript cg11354-rb, W - wrinkl…
Syncytial blastoderm	GO:0051239	regulation of multicellular organismal process	1.14e-05	0.00107	1.55	83	[upd2 - unpaired 2, ham - hamlet, d - dachs, E(spl)m3-HLH - enhancer of split m3, helix-loop-helix, oc - ocelliless, tinc - tincar, LanA - laminin a, ci - cubitus interruptus, kat-60L1 - katanin p60-like 1, PGRP-SC2 - cg14745 gene product from transcript cg14745-ra, Ser - serrate, ptc - patched, rst - roughest, stj - straightjacket, vfl - vielfaltig, pyr - pyramus, CG15537 - cg15537 gene product …
Syncytial blastoderm	GO:0060562	epithelial tube morphogenesis	1.19e-05	0.0011	2.81	19	[bab2 - bric a brac 2, Egfr - epidermal growth factor receptor, en - engrailed, rib - ribbon, hh - hedgehog, odd - odd skipped, fkh - fork head, byn - brachyenteron, Kr - kruppel, LanB1 - cg7123 gene product from transcript cg7123-ra, brk - brinker, kkv - krotzkopf verkehrt, twi - twist, opa - odd paired, shn - schnurri, ptc - patched, dac - dachshund, eya - eyes absent, dpp - decapentaplegic]
Syncytial blastoderm	GO:0007448	anterior/posterior pattern specification, imaginal disc	1.21e-05	0.00111	5.38	8	[inv - invected, hh - hedgehog, en - engrailed, shn - schnurri, abd-A - abdominal a, ptc - patched, ci - cubitus interruptus, dpp - decapentaplegic]
Syncytial blastoderm	GO:1902679	negative regulation of RNA biosynthetic process	1.25e-05	0.00112	1.86	46	[mid - midline, tsh - teashirt, retn - retained, en - engrailed, knrl - knirps-like, odd - odd skipped, fkh - fork head, kni - knirps, bowl - brother of odd with entrails limited, nab - cg33545 gene product from transcript cg33545-rc, oc - ocelliless, Gsc - goosecoid, drm - drumstick, tey - teyrha-meyrha, pnr - pannier, brk - brinker, shn - schnurri, vfl - vielfaltig, btd - buttonhead, klu - klum…
Syncytial blastoderm	GO:0045892	negative regulation of transcription, DNA-templated	1.25e-05	0.0011	1.86	46	[mid - midline, tsh - teashirt, retn - retained, en - engrailed, knrl - knirps-like, odd - odd skipped, fkh - fork head, kni - knirps, bowl - brother of odd with entrails limited, nab - cg33545 gene product from transcript cg33545-rc, oc - ocelliless, Gsc - goosecoid, drm - drumstick, tey - teyrha-meyrha, pnr - pannier, brk - brinker, shn - schnurri, vfl - vielfaltig, btd - buttonhead, klu - klum…
Syncytial blastoderm	GO:1903507	negative regulation of nucleic acid-templated transcription	1.25e-05	0.00109	1.86	46	[mid - midline, tsh - teashirt, retn - retained, en - engrailed, knrl - knirps-like, fkh - fork head, odd - odd skipped, kni - knirps, nab - cg33545 gene product from transcript cg33545-rc, bowl - brother of odd with entrails limited, oc - ocelliless, Gsc - goosecoid, drm - drumstick, tey - teyrha-meyrha, pnr - pannier, brk - brinker, shn - schnurri, vfl - vielfaltig, btd - buttonhead, klu - klum…
Syncytial blastoderm	GO:0048729	tissue morphogenesis	1.33e-05	0.00115	1.99	38	[gbb - glass bottom boat, sad - shadow, Egfr - epidermal growth factor receptor, bab2 - bric a brac 2, hh - hedgehog, tsh - teashirt, rib - ribbon, en - engrailed, odd - odd skipped, fkh - fork head, noc - no ocelli, pnr - pannier, brk - brinker, LanB1 - cg7123 gene product from transcript cg7123-ra, dib - disembodied, kuk - kugelkern, shn - schnurri, tup - tailup, ptc - patched, dac - dachshund,…
Syncytial blastoderm	GO:0007507	heart development	1.45e-05	0.00124	3.56	13	[mid - midline, hh - hedgehog, abd-A - abdominal a, LanA - laminin a, htl - heartless, Ubx - ultrabithorax, pnr - pannier, twi - twist, Antp - antennapedia, tup - tailup, Doc1 - dorsocross1, stumps - cg31317 gene product from transcript cg31317-rc, dpp - decapentaplegic]
Syncytial blastoderm	GO:0061333	renal tubule morphogenesis	1.52e-05	0.00127	4.35	10	[Kr - kruppel, Egfr - epidermal growth factor receptor, twi - twist, kkv - krotzkopf verkehrt, rib - ribbon, odd - odd skipped, fkh - fork head, shn - schnurri, dpp - decapentaplegic, byn - brachyenteron]
Syncytial blastoderm	GO:0007443	Malpighian tubule morphogenesis	1.52e-05	0.00126	4.35	10	[Kr - kruppel, Egfr - epidermal growth factor receptor, twi - twist, kkv - krotzkopf verkehrt, rib - ribbon, odd - odd skipped, fkh - fork head, shn - schnurri, dpp - decapentaplegic, byn - brachyenteron]
Syncytial blastoderm	GO:0051253	negative regulation of RNA metabolic process	1.71e-05	0.0014	1.81	48	[mid - midline, en - engrailed, retn - retained, tsh - teashirt, knrl - knirps-like, fkh - fork head, odd - odd skipped, kni - knirps, nab - cg33545 gene product from transcript cg33545-rc, Gsc - goosecoid, oc - ocelliless, bowl - brother of odd with entrails limited, drm - drumstick, tey - teyrha-meyrha, pnr - pannier, brk - brinker, shn - schnurri, elav - embryonic lethal abnormal vision, vfl -…
Syncytial blastoderm	GO:0009887	animal organ morphogenesis	1.73e-05	0.0014	1.93	40	[Egfr - epidermal growth factor receptor, drl - derailed, bab2 - bric a brac 2, hh - hedgehog, rib - ribbon, en - engrailed, retn - retained, nvy - nervy, fkh - fork head, oc - ocelliless, vri - vrille, ci - cubitus interruptus, salm - spalt major, pnr - pannier, brk - brinker, Ser - serrate, shn - schnurri, tup - tailup, siz - schizo, ptc - patched, rst - roughest, rpr - reaper, dac - dachshund,…
Syncytial blastoderm	GO:0048646	anatomical structure formation involved in morphogenesis	1.96e-05	0.00157	1.78	50	[E(spl)m3-HLH - enhancer of split m3, helix-loop-helix, Mmp1 - matrix metalloproteinase 1, sog - short gastrulation, ci - cubitus interruptus, trbl - tribbles, brk - brinker, rst - roughest, vfl - vielfaltig, wntD - wnt inhibitor of dorsal, dpn - deadpan, Kr - kruppel, rho - rhomboid, twi - twist, srp - serpent, dpp - decapentaplegic, unc-5 - cg8166 gene product from transcript cg8166-ra, slam - …
Syncytial blastoderm	GO:0061326	renal tubule development	3.21e-05	0.00253	4.93	8	[brk - brinker, hth - homothorax, Doc3 - dorsocross3, Doc1 - dorsocross1, Doc2 - dorsocross2, dpp - decapentaplegic, sog - short gastrulation, Ubx - ultrabithorax]
Syncytial blastoderm	GO:0072002	Malpighian tubule development	3.21e-05	0.0025	4.93	8	[brk - brinker, Doc3 - dorsocross3, hth - homothorax, Doc1 - dorsocross1, Doc2 - dorsocross2, sog - short gastrulation, dpp - decapentaplegic, Ubx - ultrabithorax]
Syncytial blastoderm	GO:0035290	trunk segmentation	3.71e-05	0.00286	6.34	6	[Kr - kruppel, en - engrailed, hh - hedgehog, ftz - fushi tarazu, kni - knirps, hb - hunchback]
Syncytial blastoderm	GO:0035107	appendage morphogenesis	3.99e-05	0.00304	2.09	30	[Egfr - epidermal growth factor receptor, tsh - teashirt, hh - hedgehog, bowl - brother of odd with entrails limited, GEFmeso - guanine nucleotide exchange factor in mesoderm, disco - disconnected, neur - neuralized, lft - lowfat, brk - brinker, Ser - serrate, shn - schnurri, cv-2 - crossveinless 2, ptc - patched, btd - buttonhead, Dr - drop, Lim1 - cg11354 gene product from transcript cg11354-rb…
Syncytial blastoderm	GO:0048619	embryonic hindgut morphogenesis	4.46e-05	0.00335	7.4	5	[odd - odd skipped, bowl - brother of odd with entrails limited, drm - drumstick, sob - sister of odd and bowl, dpp - decapentaplegic]
Syncytial blastoderm	GO:0035224	genital disc anterior/posterior pattern formation	4.46e-05	0.00331	7.4	5	[en - engrailed, hh - hedgehog, abd-A - abdominal a, dpp - decapentaplegic, ci - cubitus interruptus]
Syncytial blastoderm	GO:0035225	determination of genital disc primordium	4.46e-05	0.00328	7.4	5	[rho - rhomboid, Egfr - epidermal growth factor receptor, sim - single-minded, ptc - patched, abd-A - abdominal a]
Syncytial blastoderm	GO:0035221	genital disc pattern formation	4.46e-05	0.00324	7.4	5	[hh - hedgehog, en - engrailed, abd-A - abdominal a, ci - cubitus interruptus, dpp - decapentaplegic]
Syncytial blastoderm	GO:0035288	anterior head segmentation	4.46e-05	0.0032	7.4	5	[en - engrailed, hh - hedgehog, ems - empty spiracles, oc - ocelliless, btd - buttonhead]
Syncytial blastoderm	GO:0007155	cell adhesion	5.15e-05	0.00366	2.33	23	[dyl - dusky-like, beat-IIIc - cg15138 gene product from transcript cg15138-ra, Egfr - epidermal growth factor receptor, mfas - midline fasciclin, CG31004 - cg31004 gene product from transcript cg31004-rc, zye - cg5847 gene product from transcript cg5847-ra, tutl - turtle, trn - tartan, Lac - lachesin, LanA - laminin a, Mmp1 - matrix metalloproteinase 1, bib - big brain, rho - rhomboid, LanB1 - c…
Syncytial blastoderm	GO:0040011	locomotion	5.34e-05	0.00375	1.76	46	[slam - slow as molasses, Egfr - epidermal growth factor receptor, drl - derailed, hh - hedgehog, rib - ribbon, knrl - knirps-like, kni - knirps, CG34353 - cg34353 gene product from transcript cg34353-rb, Hdc - histidine decarboxylase, htl - heartless, salm - spalt major, lms - lateral muscles scarcer, LanB1 - cg7123 gene product from transcript cg7123-ra, CG10510 - cg10510 gene product from tran…
Syncytial blastoderm	GO:0034754	cellular hormone metabolic process	5.57e-05	0.00387	3.89	10	[sad - shadow, Jhe - juvenile hormone esterase, GstE14 - glutathione s transferase e14, dib - disembodied, CG9512 - cg9512 gene product from transcript cg9512-ra, CG9514 - cg9514 gene product from transcript cg9514-ra, CG9509 - cg9509 gene product from transcript cg9509-ra, phm - phantom, sro - shroud, Cyp18a1 - cytochrome p450-18a1]
Syncytial blastoderm	GO:0007379	segment specification	5.57e-05	0.00383	3.89	10	[danr - distal antenna-related, upd2 - unpaired 2, dan - distal antenna, croc - crocodile, tsh - teashirt, Antp - antennapedia, hth - homothorax, gt - giant, Ubx - ultrabithorax, tio - tiptop]
Syncytial blastoderm	GO:0007423	sensory organ development	5.61e-05	0.00382	2.01	32	[Egfr - epidermal growth factor receptor, E(spl)m3-HLH - enhancer of split m3, helix-loop-helix, tsh - teashirt, E(spl)malpha-BFM - enhancer of split malpha, bearded family member, noc - no ocelli, oc - ocelliless, Gp150 - cg5820 gene product from transcript cg5820-ra, neur - neuralized, salm - spalt major, pnr - pannier, Ser - serrate, phyl - phyllopod, tup - tailup, rst - roughest, dac - dachsh…
Syncytial blastoderm	GO:0022610	biological adhesion	6.54e-05	0.00441	2.3	23	[beat-IIIc - cg15138 gene product from transcript cg15138-ra, dyl - dusky-like, Egfr - epidermal growth factor receptor, mfas - midline fasciclin, CG31004 - cg31004 gene product from transcript cg31004-rc, zye - cg5847 gene product from transcript cg5847-ra, tutl - turtle, trn - tartan, Lac - lachesin, LanA - laminin a, Mmp1 - matrix metalloproteinase 1, bib - big brain, rho - rhomboid, LanB1 - c…
Syncytial blastoderm	GO:0010160	formation of animal organ boundary	6.63e-05	0.00442	5.18	7	[brk - brinker, lea - leak, phyl - phyllopod, sli - slit, hth - homothorax, robo - roundabout, unc-5 - cg8166 gene product from transcript cg8166-ra]
Syncytial blastoderm	GO:0007442	hindgut morphogenesis	6.63e-05	0.00438	5.18	7	[D - dichaete, hh - hedgehog, rib - ribbon, bowl - brother of odd with entrails limited, drm - drumstick, dpp - decapentaplegic, byn - brachyenteron]
Syncytial blastoderm	GO:0050793	regulation of developmental process	7.13e-05	0.00466	1.49	82	[upd2 - unpaired 2, ham - hamlet, d - dachs, bab2 - bric a brac 2, E(spl)m3-HLH - enhancer of split m3, helix-loop-helix, rib - ribbon, oc - ocelliless, tinc - tincar, LanA - laminin a, ci - cubitus interruptus, kat-60L1 - katanin p60-like 1, htl - heartless, PGRP-SC2 - cg14745 gene product from transcript cg14745-ra, Ser - serrate, ptc - patched, rst - roughest, stj - straightjacket, vfl - vielf…
Syncytial blastoderm	GO:0042659	regulation of cell fate specification	7.36e-05	0.00476	4.55	8	[sv - shaven, mid - midline, hth - homothorax, pros - prospero, eya - eyes absent, Dr - drop, Ubx - ultrabithorax, salm - spalt major]
Syncytial blastoderm	GO:0007399	nervous system development	7.89e-05	0.00505	2.75	16	[comm - commissureless, drl - derailed, sick - sickie, Lapsyn - leucine-rich repeat activity-regulated protein at synapses, oc - ocelliless, abd-A - abdominal a, spz3 - spatzle 3, neur - neuralized, bib - big brain, brk - brinker, grh - grainy head, elav - embryonic lethal abnormal vision, sca - scabrous, pros - prospero, FucTA - cg6869 gene product from transcript cg6869-ra, SoxN - soxneuro]
Syncytial blastoderm	GO:1902680	positive regulation of RNA biosynthetic process	8.59e-05	0.00545	1.64	55	[retn - retained, en - engrailed, Doc3 - dorsocross3, oc - ocelliless, prd - paired, ci - cubitus interruptus, pnr - pannier, ems - empty spiracles, tup - tailup, vfl - vielfaltig, Doc1 - dorsocross1, Doc2 - dorsocross2, vnd - ventral nervous system defective, Lim1 - cg11354 gene product from transcript cg11354-rb, hb - hunchback, e(y)2b - enhancer of yellow 2b, DOR - cg11347 gene product from tr…
Syncytial blastoderm	GO:0045893	positive regulation of transcription, DNA-templated	8.59e-05	0.0054	1.64	55	[retn - retained, en - engrailed, Doc3 - dorsocross3, oc - ocelliless, prd - paired, ci - cubitus interruptus, pnr - pannier, ems - empty spiracles, tup - tailup, Doc1 - dorsocross1, vfl - vielfaltig, Doc2 - dorsocross2, vnd - ventral nervous system defective, Lim1 - cg11354 gene product from transcript cg11354-rb, hb - hunchback, e(y)2b - enhancer of yellow 2b, DOR - cg11347 gene product from tr…
Syncytial blastoderm	GO:1903508	positive regulation of nucleic acid-templated transcription	8.59e-05	0.00534	1.64	55	[retn - retained, en - engrailed, Doc3 - dorsocross3, oc - ocelliless, prd - paired, ci - cubitus interruptus, pnr - pannier, ems - empty spiracles, tup - tailup, Doc1 - dorsocross1, vfl - vielfaltig, Doc2 - dorsocross2, vnd - ventral nervous system defective, Lim1 - cg11354 gene product from transcript cg11354-rb, hb - hunchback, e(y)2b - enhancer of yellow 2b, DOR - cg11347 gene product from tr…
Syncytial blastoderm	GO:0009890	negative regulation of biosynthetic process	8.94e-05	0.00551	1.66	52	[retn - retained, en - engrailed, knrl - knirps-like, kni - knirps, oc - ocelliless, tey - teyrha-meyrha, pnr - pannier, brk - brinker, elav - embryonic lethal abnormal vision, vfl - vielfaltig, vnd - ventral nervous system defective, Lim1 - cg11354 gene product from transcript cg11354-rb, Sxl - sex lethal, hb - hunchback, cas - castor, ph-p - polyhomeotic proximal, CG9883 - cg9883 gene product f…
Syncytial blastoderm	GO:0031327	negative regulation of cellular biosynthetic process	8.94e-05	0.00545	1.66	52	[retn - retained, en - engrailed, knrl - knirps-like, kni - knirps, oc - ocelliless, tey - teyrha-meyrha, pnr - pannier, brk - brinker, elav - embryonic lethal abnormal vision, vfl - vielfaltig, vnd - ventral nervous system defective, Lim1 - cg11354 gene product from transcript cg11354-rb, Sxl - sex lethal, hb - hunchback, cas - castor, ph-p - polyhomeotic proximal, CG9883 - cg9883 gene product f…
Syncytial blastoderm	GO:0007167	enzyme linked receptor protein signaling pathway	0.000104	0.00627	2.24	23	[gbb - glass bottom boat, drl - derailed, Egfr - epidermal growth factor receptor, daw - dawdle, Nrk - neurospecific receptor kinase, Gp150 - cg5820 gene product from transcript cg5820-ra, sog - short gastrulation, CG3216 - cg3216 gene product from transcript cg3216-rd, htl - heartless, pnr - pannier, Thor - cg8846 gene product from transcript cg8846-ra, brk - brinker, Ror - cg4926 gene product f…
Syncytial blastoderm	GO:0045934	negative regulation of nucleobase-containing compound metabolic process	0.000113	0.00676	1.69	48	[mid - midline, en - engrailed, retn - retained, tsh - teashirt, knrl - knirps-like, fkh - fork head, odd - odd skipped, kni - knirps, nab - cg33545 gene product from transcript cg33545-rc, Gsc - goosecoid, oc - ocelliless, bowl - brother of odd with entrails limited, drm - drumstick, tey - teyrha-meyrha, pnr - pannier, brk - brinker, shn - schnurri, elav - embryonic lethal abnormal vision, vfl -…
Syncytial blastoderm	GO:0042330	taxis	0.000119	0.00706	2.77	15	[cry - cryptochrome, laza - lazaro, drl - derailed, beat-IIIc - cg15138 gene product from transcript cg15138-ra, hh - hedgehog, Hdc - histidine decarboxylase, CG34353 - cg34353 gene product from transcript cg34353-rb, Sema-2b - semaphorin-2b, nan - nanchung, lea - leak, sli - slit, CG9317 - cg9317 gene product from transcript cg9317-ra, HisCl1 - histamine-gated chloride channel subunit 1, Ace - a…
Syncytial blastoderm	GO:0045455	ecdysteroid metabolic process	0.000126	0.00741	3.92	9	[sad - shadow, GstE14 - glutathione s transferase e14, dib - disembodied, CG9512 - cg9512 gene product from transcript cg9512-ra, CG9514 - cg9514 gene product from transcript cg9514-ra, CG9509 - cg9509 gene product from transcript cg9509-ra, phm - phantom, sro - shroud, Cyp18a1 - cytochrome p450-18a1]
Syncytial blastoderm	GO:0070983	dendrite guidance	0.000126	0.00735	3.92	9	[D - dichaete, comm - commissureless, drl - derailed, Toll-6 - cg7250 gene product from transcript cg7250-rc, tup - tailup, pros - prospero, robo - roundabout, NetA - netrin-a, Sema-2b - semaphorin-2b]
Syncytial blastoderm	GO:0009582	detection of abiotic stimulus	0.000129	0.00746	3.17	12	[cry - cryptochrome, nan - nanchung, laza - lazaro, Rh4 - rhodopsin 4, ninaD - neither inactivation nor afterpotential d, brv2 - brivido-2, CG9236 - cg9236 gene product from transcript cg9236-rb, CG9317 - cg9317 gene product from transcript cg9317-ra, ogre - optic ganglion reduced, stj - straightjacket, Rh3 - rhodopsin 3, ninaB - neither inactivation nor afterpotential b]
Syncytial blastoderm	GO:0009581	detection of external stimulus	0.000129	0.00739	3.17	12	[cry - cryptochrome, nan - nanchung, laza - lazaro, Rh4 - rhodopsin 4, ninaD - neither inactivation nor afterpotential d, brv2 - brivido-2, CG9236 - cg9236 gene product from transcript cg9236-rb, CG9317 - cg9317 gene product from transcript cg9317-ra, ogre - optic ganglion reduced, stj - straightjacket, Rh3 - rhodopsin 3, ninaB - neither inactivation nor afterpotential b]
Syncytial blastoderm	GO:0035114	imaginal disc-derived appendage morphogenesis	0.000129	0.00734	2.03	28	[Egfr - epidermal growth factor receptor, tsh - teashirt, hh - hedgehog, bowl - brother of odd with entrails limited, GEFmeso - guanine nucleotide exchange factor in mesoderm, disco - disconnected, neur - neuralized, lft - lowfat, brk - brinker, Ser - serrate, shn - schnurri, cv-2 - crossveinless 2, ptc - patched, btd - buttonhead, Dr - drop, Lim1 - cg11354 gene product from transcript cg11354-rb…
Syncytial blastoderm	GO:0007432	salivary gland boundary specification	0.000131	0.00739	5.55	6	[brk - brinker, lea - leak, sli - slit, hth - homothorax, robo - roundabout, unc-5 - cg8166 gene product from transcript cg8166-ra]
Syncytial blastoderm	GO:0035222	wing disc pattern formation	0.000148	0.00825	2.63	16	[gbb - glass bottom boat, inv - invected, l(2)08717 - lethal (2) 08717, en - engrailed, tsh - teashirt, hh - hedgehog, tara - taranis, nab - cg33545 gene product from transcript cg33545-rc, ci - cubitus interruptus, shn - schnurri, CG8369 - cg8369 gene product from transcript cg8369-rc, ptc - patched, Mrp4 - multidrug resistance protein 4 ortholog, Dr - drop, dpp - decapentaplegic, Notum - cg1307…
Syncytial blastoderm	GO:0008354	germ cell migration	0.00019	0.0105	2.91	13	[slam - slow as molasses, wntD - wnt inhibitor of dorsal, hh - hedgehog, Mdr49 - multi drug resistance 49, abd-A - abdominal a, hkb - huckebein, htl - heartless, byn - brachyenteron, opa - odd paired, ftz - fushi tarazu, srp - serpent, eya - eyes absent, dpp - decapentaplegic]
Syncytial blastoderm	GO:0009880	embryonic pattern specification	0.000227	0.0124	2.28	20	[Sry-delta - serendipity delta, Egfr - epidermal growth factor receptor, retn - retained, hh - hedgehog, odd - odd skipped, kni - knirps, bowl - brother of odd with entrails limited, drm - drumstick, mira - miranda, ci - cubitus interruptus, sog - short gastrulation, pnr - pannier, D - dichaete, Kr - kruppel, ftz - fushi tarazu, sob - sister of odd and bowl, dpp - decapentaplegic, hb - hunchback,…
Syncytial blastoderm	GO:0051252	regulation of RNA metabolic process	0.000231	0.0125	1.33	121	[E(spl)m3-HLH - enhancer of split m3, helix-loop-helix, rib - ribbon, knrl - knirps-like, kni - knirps, Doc3 - dorsocross3, prd - paired, pnr - pannier, brk - brinker, CG34224 - cg34224 gene product from transcript cg34224-ra, elav - embryonic lethal abnormal vision, ems - empty spiracles, cv-2 - crossveinless 2, Doc1 - dorsocross1, vfl - vielfaltig, dac - dachshund, Doc2 - dorsocross2, vnd - ven…
Syncytial blastoderm	GO:0010002	cardioblast differentiation	0.000238	0.0128	6.16	5	[abd-A - abdominal a, dpp - decapentaplegic, pyr - pyramus, htl - heartless, pnr - pannier]
Syncytial blastoderm	GO:0061327	anterior Malpighian tubule development	0.000238	0.0127	6.16	5	[Doc3 - dorsocross3, Doc1 - dorsocross1, Doc2 - dorsocross2, dpp - decapentaplegic, Ubx - ultrabithorax]
Syncytial blastoderm	GO:0010558	negative regulation of macromolecule biosynthetic process	0.000238	0.0126	1.63	49	[retn - retained, en - engrailed, knrl - knirps-like, kni - knirps, oc - ocelliless, tey - teyrha-meyrha, pnr - pannier, brk - brinker, elav - embryonic lethal abnormal vision, vfl - vielfaltig, vnd - ventral nervous system defective, Lim1 - cg11354 gene product from transcript cg11354-rb, Sxl - sex lethal, hb - hunchback, cas - castor, ph-p - polyhomeotic proximal, CG9883 - cg9883 gene product f…
Syncytial blastoderm	GO:2000113	negative regulation of cellular macromolecule biosynthetic process	0.000238	0.0125	1.63	49	[retn - retained, en - engrailed, knrl - knirps-like, kni - knirps, oc - ocelliless, tey - teyrha-meyrha, pnr - pannier, brk - brinker, elav - embryonic lethal abnormal vision, vfl - vielfaltig, vnd - ventral nervous system defective, Lim1 - cg11354 gene product from transcript cg11354-rb, Sxl - sex lethal, hb - hunchback, cas - castor, ph-p - polyhomeotic proximal, CG9883 - cg9883 gene product f…
Syncytial blastoderm	GO:0003008	system process	0.000239	0.0125	1.75	39	[upd2 - unpaired 2, Rh4 - rhodopsin 4, Egfr - epidermal growth factor receptor, drl - derailed, mid - midline, gk - geko, CG7589 - cg7589 gene product from transcript cg7589-rb, nemy - no extended memory, ppk19 - pickpocket 19, Obp99a - odorant-binding protein 99a, neur - neuralized, Nha1 - na[+]/h[+] hydrogen antiporter 1, salm - spalt major, pnr - pannier, CG9313 - cg9313 gene product from tran…
Syncytial blastoderm	GO:0008595	anterior/posterior axis specification, embryo	0.000266	0.0138	3.36	10	[Kr - kruppel, Sry-delta - serendipity delta, hh - hedgehog, kni - knirps, mira - miranda, dpp - decapentaplegic, sog - short gastrulation, hb - hunchback, gt - giant, tsl - torso-like]
Syncytial blastoderm	GO:0007409	axonogenesis	0.00027	0.0139	2.83	13	[drl - derailed, mid - midline, sick - sickie, Cdk5alpha - cdk5 activator-like protein, en - engrailed, hh - hedgehog, mfas - midline fasciclin, Nrt - neurotactin, rho - rhomboid, ems - empty spiracles, sim - single-minded, pros - prospero, ckn - caskin]
Syncytial blastoderm	GO:0008586	imaginal disc-derived wing vein morphogenesis	0.000284	0.0144	2.96	12	[rho - rhomboid, gbb - glass bottom boat, d - dachs, Egfr - epidermal growth factor receptor, shn - schnurri, tok - tolkin, Socs36E - suppressor of cytokine signaling at 36e, dpp - decapentaplegic, sog - short gastrulation, net - cg11450 gene product from transcript cg11450-rb, emc - extra macrochaetae, salm - spalt major]
Syncytial blastoderm	GO:0007474	imaginal disc-derived wing vein specification	0.000284	0.0144	3.13	11	[rho - rhomboid, gbb - glass bottom boat, Atx-1 - ataxin 1, inv - invected, Egfr - epidermal growth factor receptor, hh - hedgehog, en - engrailed, cv-2 - crossveinless 2, GEFmeso - guanine nucleotide exchange factor in mesoderm, dpp - decapentaplegic, net - cg11450 gene product from transcript cg11450-rb]
Syncytial blastoderm	GO:0007424	open tracheal system development	0.000303	0.0152	2.58	15	[rib - ribbon, noc - no ocelli, vri - vrille, Lac - lachesin, Mipp1 - multiple inositol polyphosphate phosphatase 1, Mmp1 - matrix metalloproteinase 1, Ubx - ultrabithorax, salm - spalt major, kkv - krotzkopf verkehrt, grh - grainy head, ems - empty spiracles, Cad88C - cadherin 88c, stumps - cg31317 gene product from transcript cg31317-rc, dpp - decapentaplegic, W - wrinkled]
Syncytial blastoderm	GO:0060541	respiratory system development	0.000303	0.0151	2.58	15	[rib - ribbon, noc - no ocelli, vri - vrille, Mipp1 - multiple inositol polyphosphate phosphatase 1, Lac - lachesin, Mmp1 - matrix metalloproteinase 1, Ubx - ultrabithorax, salm - spalt major, kkv - krotzkopf verkehrt, grh - grainy head, ems - empty spiracles, Cad88C - cadherin 88c, stumps - cg31317 gene product from transcript cg31317-rc, dpp - decapentaplegic, W - wrinkled]
Syncytial blastoderm	GO:0051254	positive regulation of RNA metabolic process	0.000318	0.0157	1.56	55	[retn - retained, en - engrailed, Doc3 - dorsocross3, oc - ocelliless, prd - paired, ci - cubitus interruptus, pnr - pannier, ems - empty spiracles, tup - tailup, Doc1 - dorsocross1, vfl - vielfaltig, Doc2 - dorsocross2, vnd - ventral nervous system defective, Lim1 - cg11354 gene product from transcript cg11354-rb, hb - hunchback, e(y)2b - enhancer of yellow 2b, DOR - cg11347 gene product from tr…
Syncytial blastoderm	GO:0001704	formation of primary germ layer	0.000331	0.0162	7.4	4	[fkh - fork head, srp - serpent, hkb - huckebein, Ubx - ultrabithorax]
Syncytial blastoderm	GO:0001706	endoderm formation	0.000331	0.0161	7.4	4	[fkh - fork head, srp - serpent, hkb - huckebein, Ubx - ultrabithorax]
Syncytial blastoderm	GO:0001742	oenocyte differentiation	0.000331	0.016	7.4	4	[rho - rhomboid, Egfr - epidermal growth factor receptor, hth - homothorax, abd-A - abdominal a]
Syncytial blastoderm	GO:0050911	detection of chemical stimulus involved in sensory perception of smell	0.000331	0.0159	7.4	4	[Or22b - odorant receptor 22b, Or22a - odorant receptor 22a, Ir75a - ionotropic receptor 75a, Or85f - odorant receptor 85f]
Syncytial blastoderm	GO:0007604	phototransduction, UV	0.000331	0.0158	7.4	4	[Rh4 - rhodopsin 4, ninaD - neither inactivation nor afterpotential d, ninaB - neither inactivation nor afterpotential b, Rh3 - rhodopsin 3]
Syncytial blastoderm	GO:0035215	genital disc development	0.000331	0.0157	7.4	4	[en - engrailed, hh - hedgehog, dac - dachshund, dpp - decapentaplegic]
Syncytial blastoderm	GO:0007501	mesodermal cell fate specification	0.000331	0.0155	7.4	4	[twi - twist, abd-A - abdominal a, pyr - pyramus, Ubx - ultrabithorax]
Syncytial blastoderm	GO:0007506	gonadal mesoderm development	0.000331	0.0154	7.4	4	[hh - hedgehog, ftz - fushi tarazu, abd-A - abdominal a, htl - heartless]
Syncytial blastoderm	GO:0009589	detection of UV	0.000331	0.0153	7.4	4	[Rh4 - rhodopsin 4, ninaD - neither inactivation nor afterpotential d, Rh3 - rhodopsin 3, ninaB - neither inactivation nor afterpotential b]
Syncytial blastoderm	GO:0060485	mesenchyme development	0.000331	0.0152	7.4	4	[hh - hedgehog, ftz - fushi tarazu, abd-A - abdominal a, htl - heartless]
Syncytial blastoderm	GO:0035050	embryonic heart tube development	0.000342	0.0156	4.31	7	[mid - midline, lea - leak, sli - slit, tup - tailup, srp - serpent, robo - roundabout, pnr - pannier]
Syncytial blastoderm	GO:0007165	signal transduction	0.000343	0.0155	1.43	80	[upd2 - unpaired 2, Rh4 - rhodopsin 4, E(spl)m3-HLH - enhancer of split m3, helix-loop-helix, daw - dawdle, Gyc-89Da - guanylyl cyclase at 89da, E(spl)malpha-BFM - enhancer of split malpha, bearded family member, Gp150 - cg5820 gene product from transcript cg5820-ra, Rgk2 - cg34390 gene product from transcript cg34390-ra, ninaB - neither inactivation nor afterpotential b, ci - cubitus interruptus…
Syncytial blastoderm	GO:2000274	regulation of epithelial cell migration, open tracheal system	0.000349	0.0157	4.93	6	[lea - leak, hh - hedgehog, sli - slit, ptc - patched, robo - roundabout, ple - pale]
Syncytial blastoderm	GO:0048634	regulation of muscle organ development	0.000349	0.0156	4.93	6	[gbb - glass bottom boat, twi - twist, abd-A - abdominal a, rst - roughest, dpp - decapentaplegic, Ubx - ultrabithorax]
Syncytial blastoderm	GO:0035239	tube morphogenesis	0.000358	0.0158	2.04	24	[Egfr - epidermal growth factor receptor, bab2 - bric a brac 2, hh - hedgehog, rib - ribbon, en - engrailed, fkh - fork head, odd - odd skipped, noc - no ocelli, trn - tartan, hkb - huckebein, byn - brachyenteron, Kr - kruppel, LanB1 - cg7123 gene product from transcript cg7123-ra, brk - brinker, kkv - krotzkopf verkehrt, twi - twist, grh - grainy head, opa - odd paired, shn - schnurri, ptc - pat…
Syncytial blastoderm	GO:2000026	regulation of multicellular organismal development	0.000441	0.0194	1.48	66	[ham - hamlet, d - dachs, E(spl)m3-HLH - enhancer of split m3, helix-loop-helix, oc - ocelliless, tinc - tincar, LanA - laminin a, kat-60L1 - katanin p60-like 1, ci - cubitus interruptus, Ser - serrate, PGRP-SC2 - cg14745 gene product from transcript cg14745-ra, ptc - patched, stj - straightjacket, vfl - vielfaltig, rst - roughest, pyr - pyramus, hb - hunchback, W - wrinkled, wntD - wnt inhibitor…
Syncytial blastoderm	GO:0035120	post-embryonic appendage morphogenesis	0.000479	0.0209	1.94	26	[Egfr - epidermal growth factor receptor, tsh - teashirt, hh - hedgehog, bowl - brother of odd with entrails limited, GEFmeso - guanine nucleotide exchange factor in mesoderm, neur - neuralized, lft - lowfat, brk - brinker, Ser - serrate, shn - schnurri, cv-2 - crossveinless 2, ptc - patched, btd - buttonhead, Dr - drop, Lim1 - cg11354 gene product from transcript cg11354-rb, mirr - mirror, Cyp18…
Syncytial blastoderm	GO:2000112	regulation of cellular macromolecule biosynthetic process	0.000544	0.0236	1.31	120	[rib - ribbon, E(spl)m3-HLH - enhancer of split m3, helix-loop-helix, knrl - knirps-like, Doc3 - dorsocross3, kni - knirps, prd - paired, pnr - pannier, brk - brinker, CG34224 - cg34224 gene product from transcript cg34224-ra, elav - embryonic lethal abnormal vision, ems - empty spiracles, cv-2 - crossveinless 2, Doc1 - dorsocross1, vfl - vielfaltig, dac - dachshund, Doc2 - dorsocross2, vnd - ven…
Syncytial blastoderm	GO:0010556	regulation of macromolecule biosynthetic process	0.000653	0.0282	1.3	120	[rib - ribbon, E(spl)m3-HLH - enhancer of split m3, helix-loop-helix, knrl - knirps-like, Doc3 - dorsocross3, kni - knirps, prd - paired, pnr - pannier, brk - brinker, CG34224 - cg34224 gene product from transcript cg34224-ra, ems - empty spiracles, elav - embryonic lethal abnormal vision, cv-2 - crossveinless 2, Doc1 - dorsocross1, vfl - vielfaltig, dac - dachshund, Doc2 - dorsocross2, vnd - ven…
Syncytial blastoderm	GO:0022008	neurogenesis	0.000655	0.028	3.98	7	[Egfr - epidermal growth factor receptor, retn - retained, cas - castor, bnb - bangles and beads, klu - klumpfuss, gcm - glial cells missing, hb - hunchback]
Syncytial blastoderm	GO:2000177	regulation of neural precursor cell proliferation	0.000703	0.0299	2.6	13	[E(spl)m3-HLH - enhancer of split m3, helix-loop-helix, cas - castor, nub - nubbin, dpn - deadpan, MED11 - mediator complex subunit 11, Kr - kruppel, vfl - vielfaltig, pros - prospero, wor - worniu, btd - buttonhead, klu - klumpfuss, SoxN - soxneuro, hb - hunchback]
Syncytial blastoderm	GO:0002052	positive regulation of neuroblast proliferation	0.000739	0.0312	5.28	5	[E(spl)m3-HLH - enhancer of split m3, helix-loop-helix, vfl - vielfaltig, pros - prospero, klu - klumpfuss, dpn - deadpan]
Syncytial blastoderm	GO:0001710	mesodermal cell fate commitment	0.000739	0.031	5.28	5	[twi - twist, srp - serpent, stumps - cg31317 gene product from transcript cg31317-rc, pyr - pyramus, htl - heartless]
Syncytial blastoderm	GO:2000179	positive regulation of neural precursor cell proliferation	0.000739	0.0308	5.28	5	[E(spl)m3-HLH - enhancer of split m3, helix-loop-helix, pros - prospero, vfl - vielfaltig, klu - klumpfuss, dpn - deadpan]
Syncytial blastoderm	GO:0060795	cell fate commitment involved in formation of primary germ layer	0.000739	0.0306	5.28	5	[twi - twist, srp - serpent, stumps - cg31317 gene product from transcript cg31317-rc, pyr - pyramus, htl - heartless]
Syncytial blastoderm	GO:0010669	epithelial structure maintenance	0.000773	0.0318	4.44	6	[upd2 - unpaired 2, rho - rhomboid, Egfr - epidermal growth factor receptor, Lac - lachesin, ird1 - immune response deficient 1, Pi3K59F - phosphotidylinositol 3 kinase 59f]
Syncytial blastoderm	GO:0035277	spiracle morphogenesis, open tracheal system	0.000773	0.0316	4.44	6	[Egfr - epidermal growth factor receptor, en - engrailed, hh - hedgehog, ems - empty spiracles, ci - cubitus interruptus, salm - spalt major]
Syncytial blastoderm	GO:0007455	eye-antennal disc morphogenesis	0.000773	0.0314	4.44	6	[Egfr - epidermal growth factor receptor, bab2 - bric a brac 2, opa - odd paired, ptc - patched, eya - eyes absent, dpp - decapentaplegic]
Syncytial blastoderm	GO:0010628	positive regulation of gene expression	0.000869	0.0351	1.47	61	[retn - retained, en - engrailed, Doc3 - dorsocross3, oc - ocelliless, prd - paired, ci - cubitus interruptus, pnr - pannier, ems - empty spiracles, tup - tailup, vfl - vielfaltig, Doc1 - dorsocross1, Doc2 - dorsocross2, vnd - ventral nervous system defective, Lim1 - cg11354 gene product from transcript cg11354-rb, hb - hunchback, e(y)2b - enhancer of yellow 2b, DOR - cg11347 gene product from tr…
Syncytial blastoderm	GO:0010629	negative regulation of gene expression	0.000869	0.0349	1.47	61	[CG17265 - cg17265 gene product from transcript cg17265-ra, retn - retained, en - engrailed, knrl - knirps-like, kni - knirps, noc - no ocelli, oc - ocelliless, tey - teyrha-meyrha, pnr - pannier, brk - brinker, elav - embryonic lethal abnormal vision, vfl - vielfaltig, dac - dachshund, Dr - drop, vnd - ventral nervous system defective, Lim1 - cg11354 gene product from transcript cg11354-rb, Sxl …
Syncytial blastoderm	GO:0010453	regulation of cell fate commitment	0.00092	0.0367	3.17	9	[sv - shaven, mid - midline, hth - homothorax, pros - prospero, eya - eyes absent, Socs36E - suppressor of cytokine signaling at 36e, Dr - drop, Ubx - ultrabithorax, salm - spalt major]
Syncytial blastoderm	GO:0021782	glial cell development	0.00092	0.0365	3.17	9	[cas - castor, CG8965 - cg8965 gene product from transcript cg8965-ra, vnd - ventral nervous system defective, stumps - cg31317 gene product from transcript cg31317-rc, Dr - drop, pyr - pyramus, gcm - glial cells missing, htl - heartless, salm - spalt major]
Syncytial blastoderm	GO:0061061	muscle structure development	0.000948	0.0374	2.28	16	[retn - retained, fln - flightin, htl - heartless, Ubx - ultrabithorax, HLH54F - cg5005 gene product from transcript cg5005-ra, salm - spalt major, Kr - kruppel, Thor - cg8846 gene product from transcript cg8846-ra, lms - lateral muscles scarcer, Msp-300 - muscle-specific protein 300, hth - homothorax, Tsp - thrombospondin, eya - eyes absent, Dr - drop, pyr - pyramus, insc - inscuteable]
Syncytial blastoderm	GO:0019219	regulation of nucleobase-containing compound metabolic process	0.000967	0.0379	1.29	122	[E(spl)m3-HLH - enhancer of split m3, helix-loop-helix, rib - ribbon, knrl - knirps-like, kni - knirps, Doc3 - dorsocross3, prd - paired, pnr - pannier, brk - brinker, CG34224 - cg34224 gene product from transcript cg34224-ra, elav - embryonic lethal abnormal vision, ems - empty spiracles, cv-2 - crossveinless 2, Doc1 - dorsocross1, vfl - vielfaltig, Doc2 - dorsocross2, dac - dachshund, vnd - ven…
Cellular blastoderm	GO:0007600	sensory perception	4.76e-07	0.00326	1.85	45	[nompC - no mechanoreceptor potential c, stops - slow termination of phototransduction, dpr7 - cg33481 gene product from transcript cg33481-rf, wtrw - water witch, cp309 - cg33957 gene product from transcript cg33957-rm, Gr63a - gustatory receptor 63a, if - inflated, CheA29a - chemosensory protein a 29a, CG10426 - cg10426 gene product from transcript cg10426-ra, Or2a - odorant receptor 2a, sei - …
Cellular blastoderm	GO:0007606	sensory perception of chemical stimulus	2.66e-06	0.00912	2.11	27	[dpr7 - cg33481 gene product from transcript cg33481-rf, Gr63a - gustatory receptor 63a, if - inflated, CheA29a - chemosensory protein a 29a, Or2a - odorant receptor 2a, dpr18 - cg14948 gene product from transcript cg14948-ra, Gr47b - gustatory receptor 47b, Mvl - malvolio, Galpha49B - g protein alpha49b, mew - multiple edematous wings, Kap3 - kinesin associated protein 3, Obp59a - odorant-bindin…
Cellular blastoderm	GO:0051056	regulation of small GTPase mediated signal transduction	1.5e-05	0.0342	1.69	46	[MESR4 - misexpression suppressor of ras 4, S6kII - ribosomal protein s6 kinase ii, CG2976 - cg2976 gene product from transcript cg2976-rb, Gef64C - guanine nucleotide exchange factor gef64c, step - steppke, Uba1 - ubiquitin activating enzyme 1, RhoGAP54D - cg6477 gene product from transcript cg6477-ra, Efa6 - efa6 pleckstrin and sec7 domain containing, CG5937 - cg5937 gene product from transcrip…
Cellular blastoderm	GO:0046578	regulation of Ras protein signal transduction	3.2e-05	0.0549	1.68	43	[MESR4 - misexpression suppressor of ras 4, S6kII - ribosomal protein s6 kinase ii, CG2976 - cg2976 gene product from transcript cg2976-rb, Gef64C - guanine nucleotide exchange factor gef64c, Uba1 - ubiquitin activating enzyme 1, step - steppke, Efa6 - efa6 pleckstrin and sec7 domain containing, CG5937 - cg5937 gene product from transcript cg5937-rd, pbl - pebble, CG7369 - cg7369 gene product fro…
Cellular blastoderm	GO:0007218	neuropeptide signaling pathway	0.000142	0.195	2.7	10	[Akh - adipokinetic hormone, SIFR - sifamide receptor, Ccap - cardioacceleratory peptide, itp - ion transport peptide, Ast-C - allatostatin c, GRHRII - cg10698 gene product from transcript cg10698-ra, amn - amnesiac, Nplp2 - neuropeptide-like precursor 2, Dh31 - diuretic hormone 31, ETH - ecdysis triggering hormone]
Cellular blastoderm	GO:0010037	response to carbon dioxide	0.000165	0.188	2.97	8	[Gr63a - gustatory receptor 63a, Gr43a - gustatory receptor 43a, Gr59f - gustatory receptor 59f, Gr47b - gustatory receptor 47b, Gr36a - gustatory receptor 36a, Gr36b - gustatory receptor 36b, Galpha49B - g protein alpha49b, Gr36c - gustatory receptor 36c]
Cellular blastoderm	GO:0007398	ectoderm development	0.000165	0.161	2.97	8	[mam - mastermind, ind - intermediate neuroblasts defective, amx - almondex, peb - pebbled, pdm2 - pou domain protein 2, Dl - delta, ush - u-shaped, N - notch]
Cellular blastoderm	GO:0030001	metal ion transport	0.000427	0.366	1.56	41	[Fer3HCH - ferritin 3 heavy chain homologue, nompC - no mechanoreceptor potential c, wtrw - water witch, Task6 - cg9637 gene product from transcript cg9637-rd, CG18110 - cg18110 gene product from transcript cg18110-rb, Ca-alpha1T - ca[2+]-channel protein alpha[[1]] subunit t, Ndfip - nedd4 family interacting protein, cac - cacophony, trpgamma - cg5996 gene product from transcript cg5996-rd, pyx -…
Cellular blastoderm	GO:0007605	sensory perception of sound	0.000427	0.325	1.91	20	[nompC - no mechanoreceptor potential c, Klp64D - kinesin-like protein at 64d, stops - slow termination of phototransduction, wtrw - water witch, cp309 - cg33957 gene product from transcript cg33957-rm, Arr2 - arrestin 2, CG10426 - cg10426 gene product from transcript cg10426-ra, sei - seizure, iav - inactive, Myo10A - myosin 10a, unc - uncoordinated, CG13636 - cg13636 gene product from transcrip…
Cellular blastoderm	GO:0098742	cell-cell adhesion via plasma-membrane adhesion molecules	0.000446	0.306	1.94	19	[fw - furrowed, if - inflated, shg - shotgun, Cad99C - cadherin 99c, stan - starry night, alphaPS4 - cg16827 gene product from transcript cg16827-ra, caps - capricious, klg - klingon, ImpL2 - ecdysone-inducible gene l2, Fas2 - fasciclin 2, baz - bazooka, Con - connectin, Cad96Ca - cadherin 96ca, CadN - cadherin-n, hbs - hibris, mew - multiple edematous wings, alphaPS5 - cg5372 gene product from t…
Cellular blastoderm	GO:0050913	sensory perception of bitter taste	0.00049	0.305	2.97	7	[Gr63a - gustatory receptor 63a, Gr43a - gustatory receptor 43a, Gr59f - gustatory receptor 59f, Gr47b - gustatory receptor 47b, Gr36a - gustatory receptor 36a, Gr36b - gustatory receptor 36b, Gr36c - gustatory receptor 36c]
Cellular blastoderm	GO:0006928	movement of cell or subcellular component	0.000505	0.289	1.23	165	[sfl - sulfateless, Mmp2 - matrix metalloproteinase 2, cpa - capping protein alpha, if - inflated, shg - shotgun, Rab6 - cg6601 gene product from transcript cg6601-ra, sas - stranded at second, fra - frazzled, bun - bunched, neb - nebbish, mthl1 - methuselah-like 1, Sin3A - cg8815 gene product from transcript cg8815-rc, CG4552 - cg4552 gene product from transcript cg4552-ra, spas - spastin, Abd-B…
Cellular blastoderm	GO:0030154	cell differentiation	0.000738	0.389	1.38	70	[MESR4 - misexpression suppressor of ras 4, Scm - sex comb on midleg, Tor - target of rapamycin, ihog - interference hedgehog, E(spl)mdelta-HLH - enhancer of split mdelta, helix-loop-helix, dm - diminutive, Dhc64C - dynein heavy chain 64c, ths - thisbe, exex - extra-extra, bun - bunched, ss - spineless, Abd-B - abdominal b, Hr96 - hormone receptor-like in 96, CG7056 - cg7056 gene product from tra…
Cellular blastoderm	GO:0048731	system development	0.000925	0.453	1.37	70	[spz6 - spatzle 6, tou - toutatis, mam - mastermind, Mmp2 - matrix metalloproteinase 2, shg - shotgun, Pex1 - peroxin 1, serp - serpentine, raw - cg12437 gene product from transcript cg12437-rb, Hs2st - heparan sulfate 2-o-sulfotransferase, pbl - pebble, ind - intermediate neuroblasts defective, exex - extra-extra, bnl - branchless, zfh2 - zn finger homeodomain 2, Abd-B - abdominal b, Pgant35A - …
